# Supplementary figures and images for: Tissue Specificity and Dynamics of Sex-Biased Gene Expression in a Common Frog Population with Differentiated, Yet Homomorphic, Sex Chromosomes
Source: MDPI journal article supplement (doi:10.3390/genes9060294), 2018-06-12

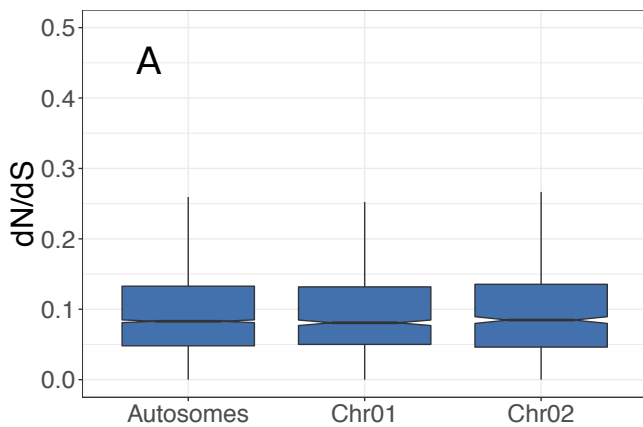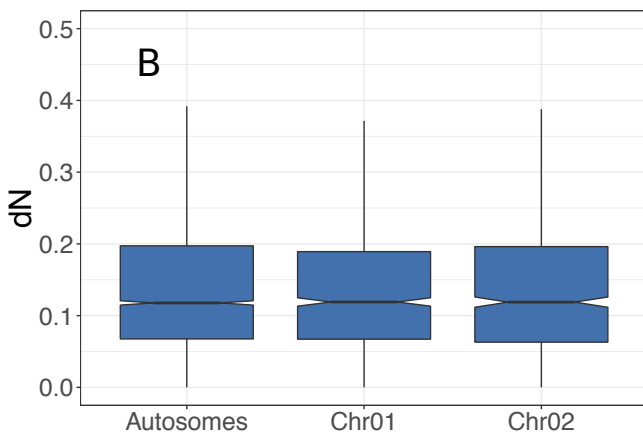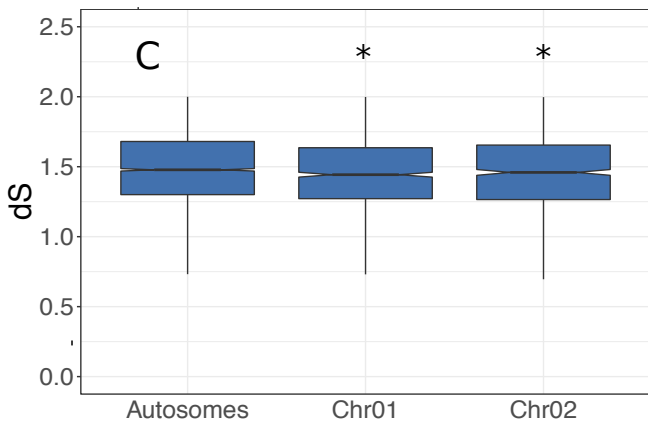

Supplement: s1 [file s1]

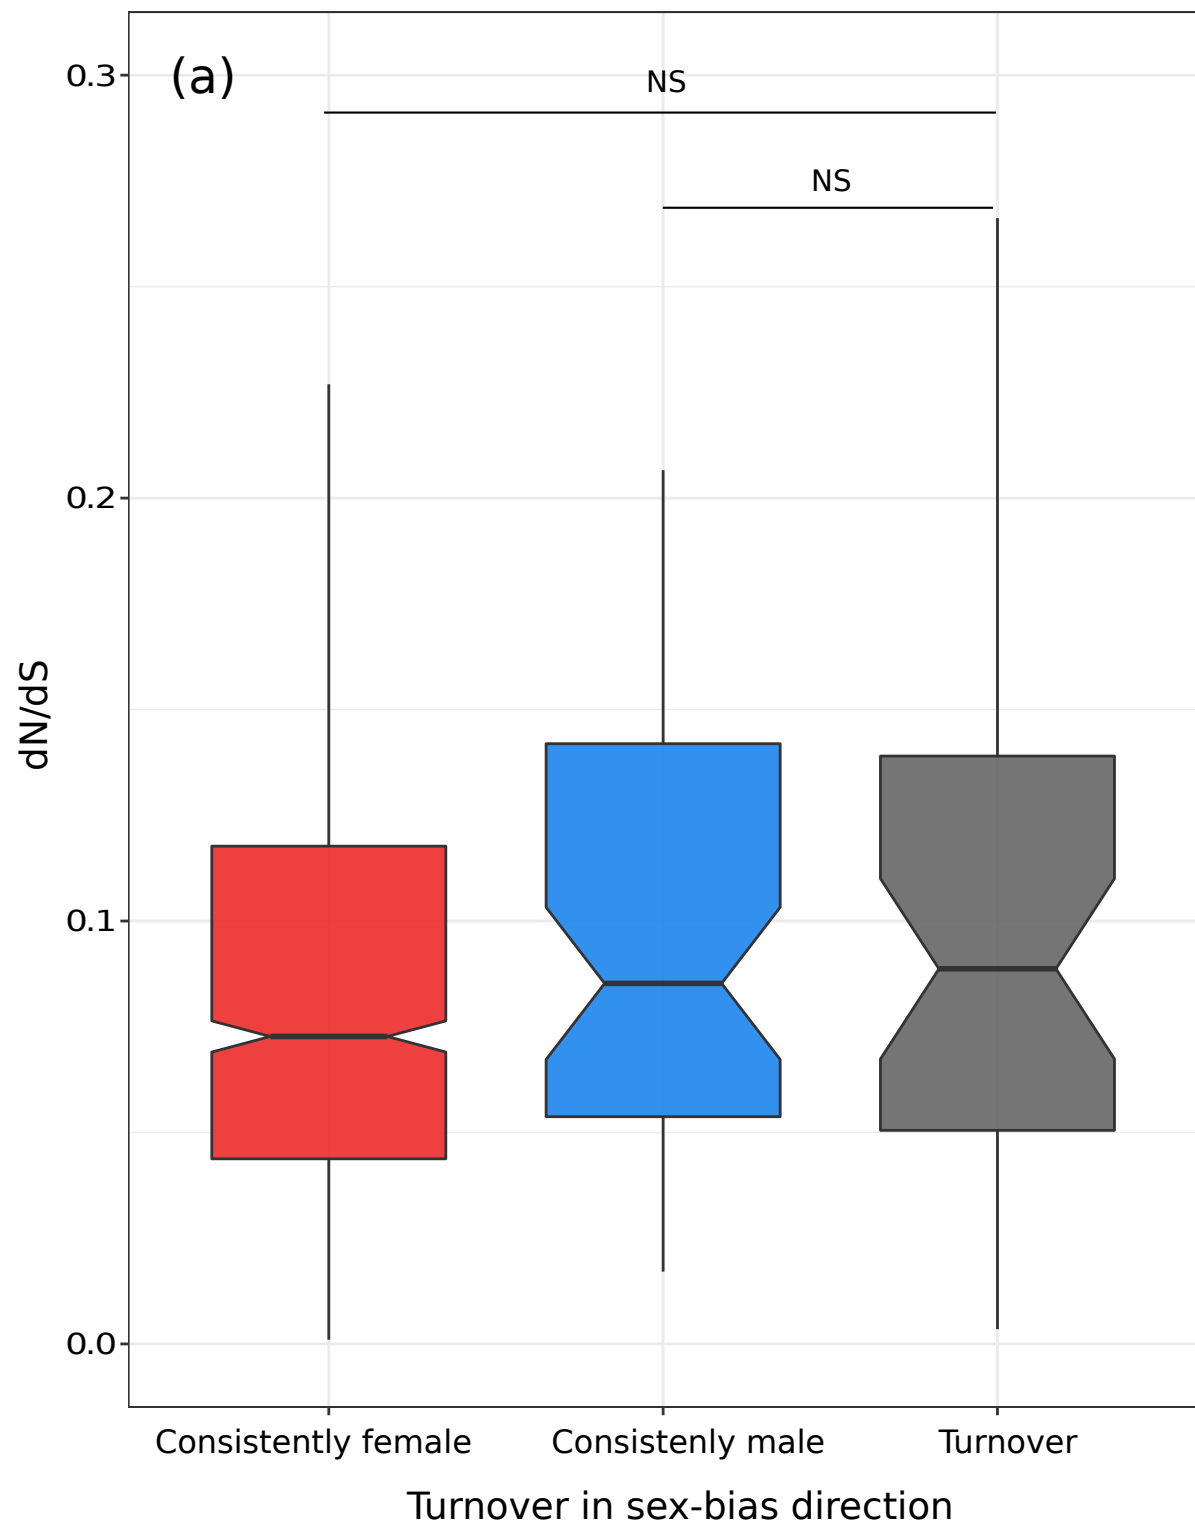

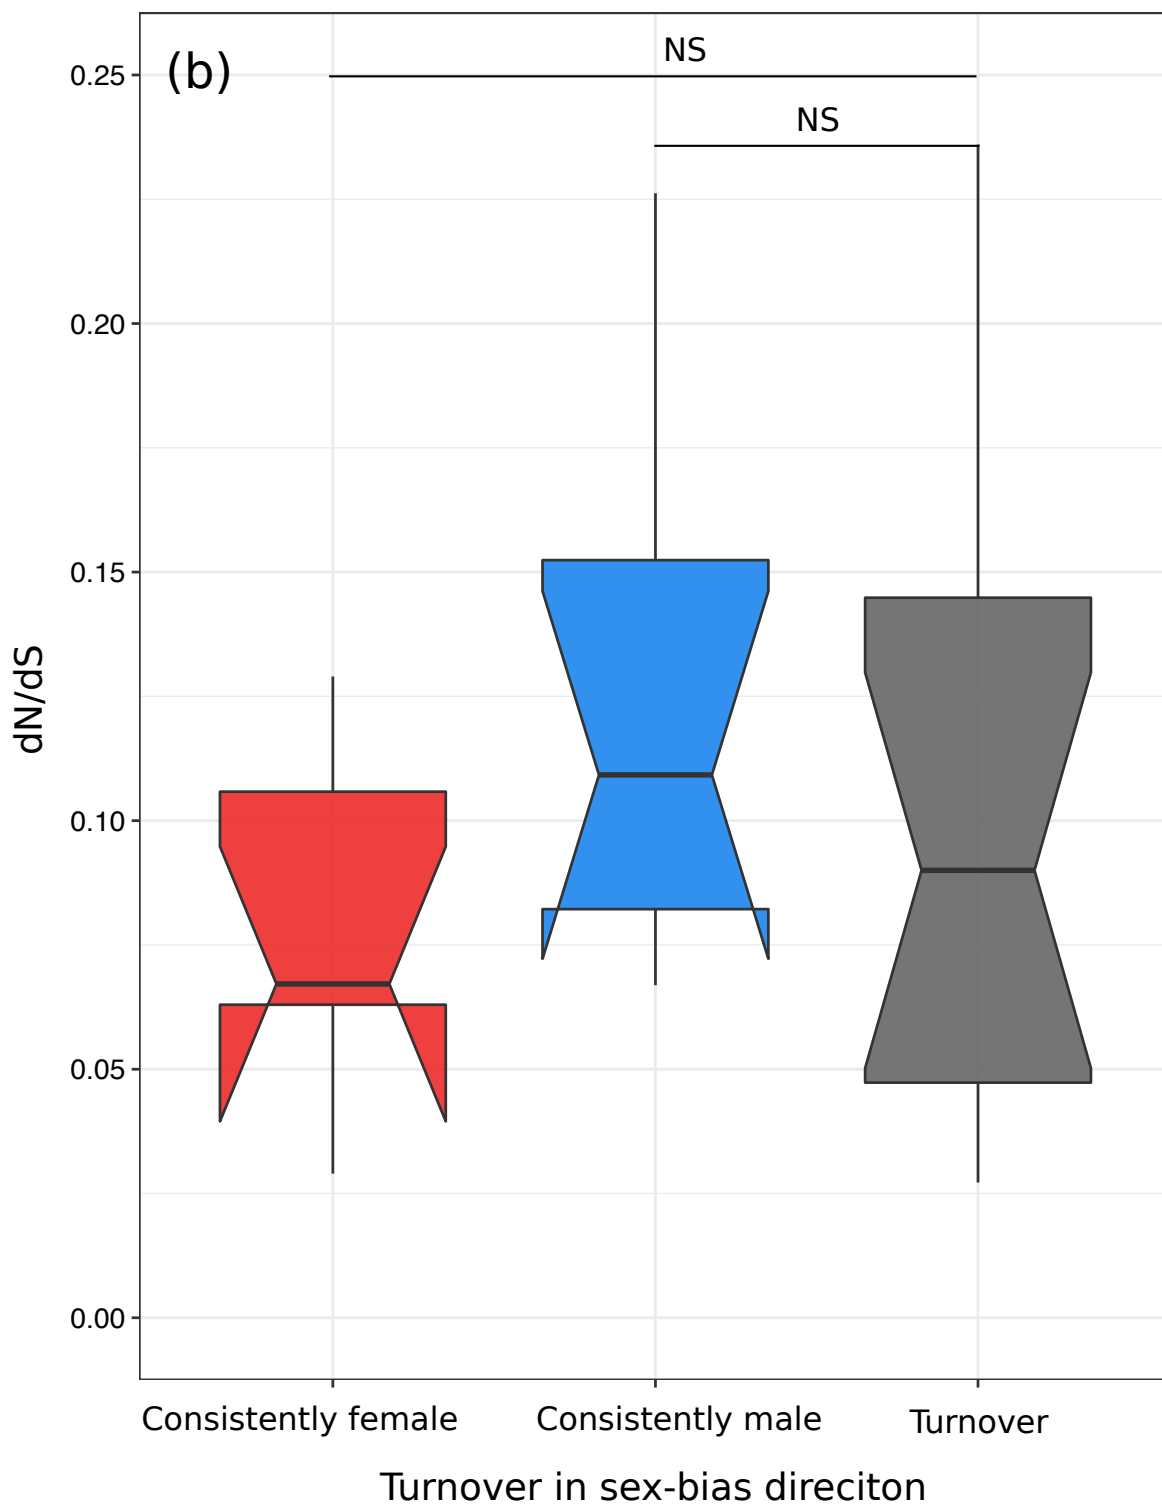

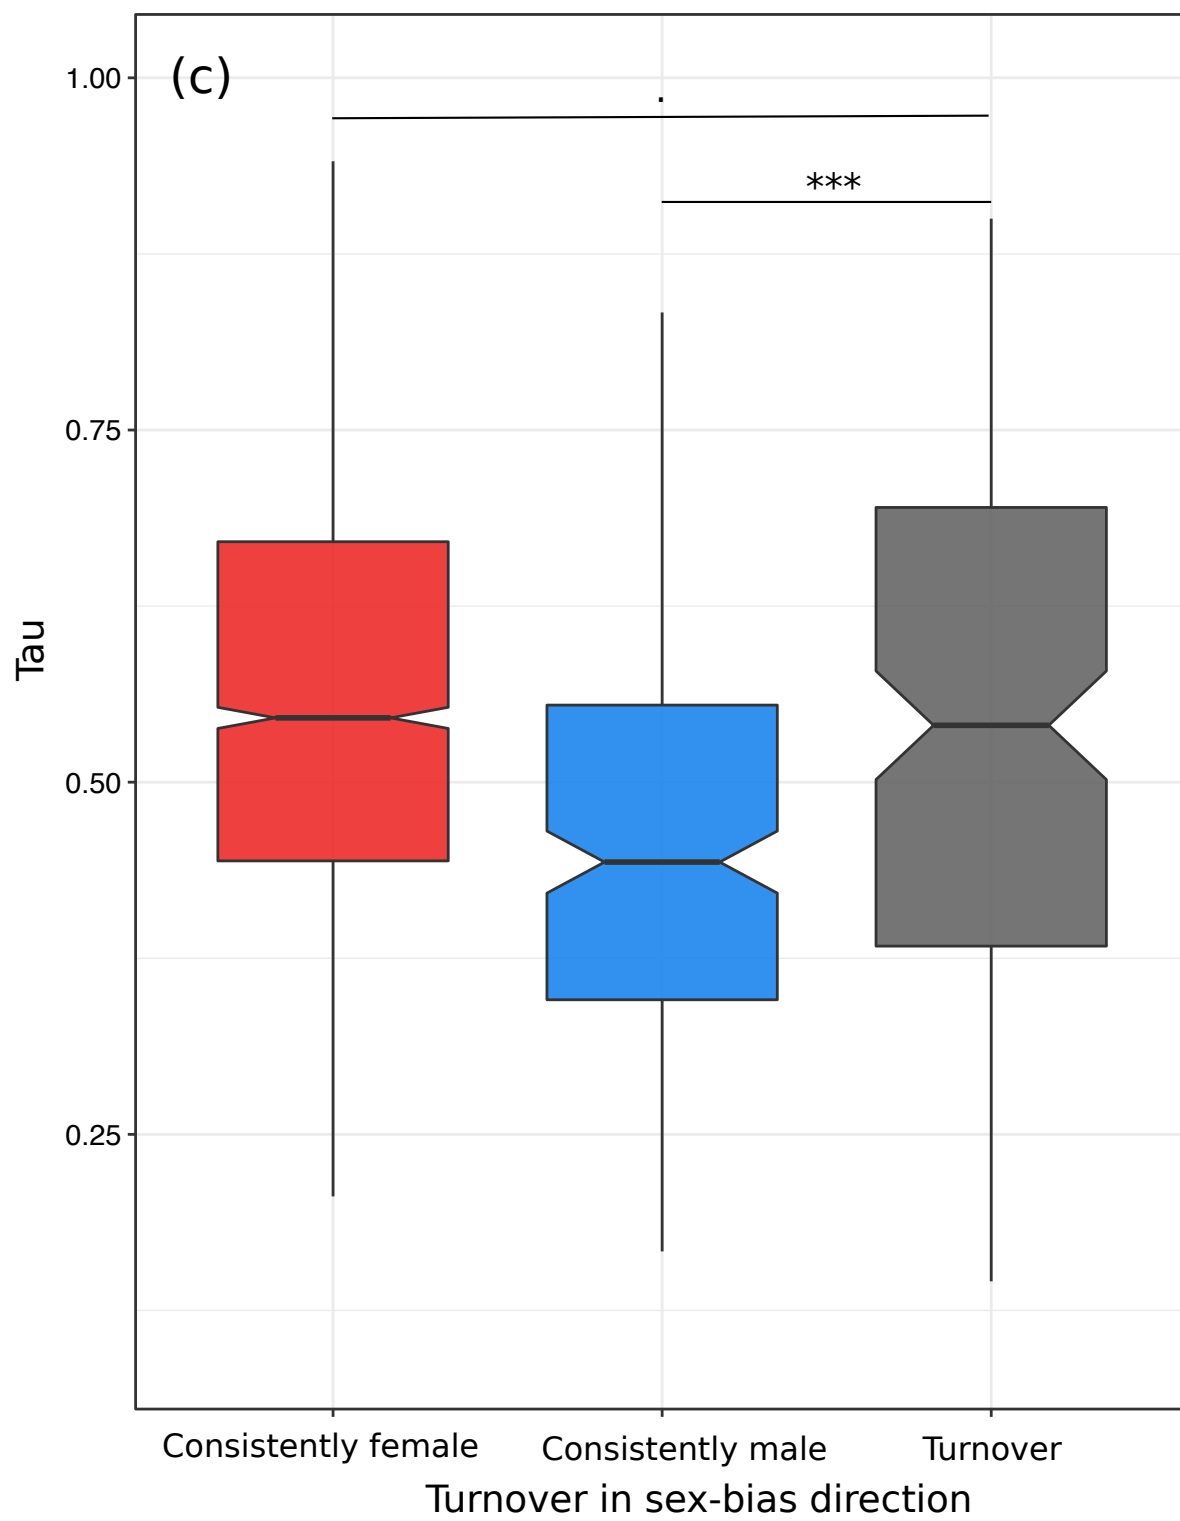

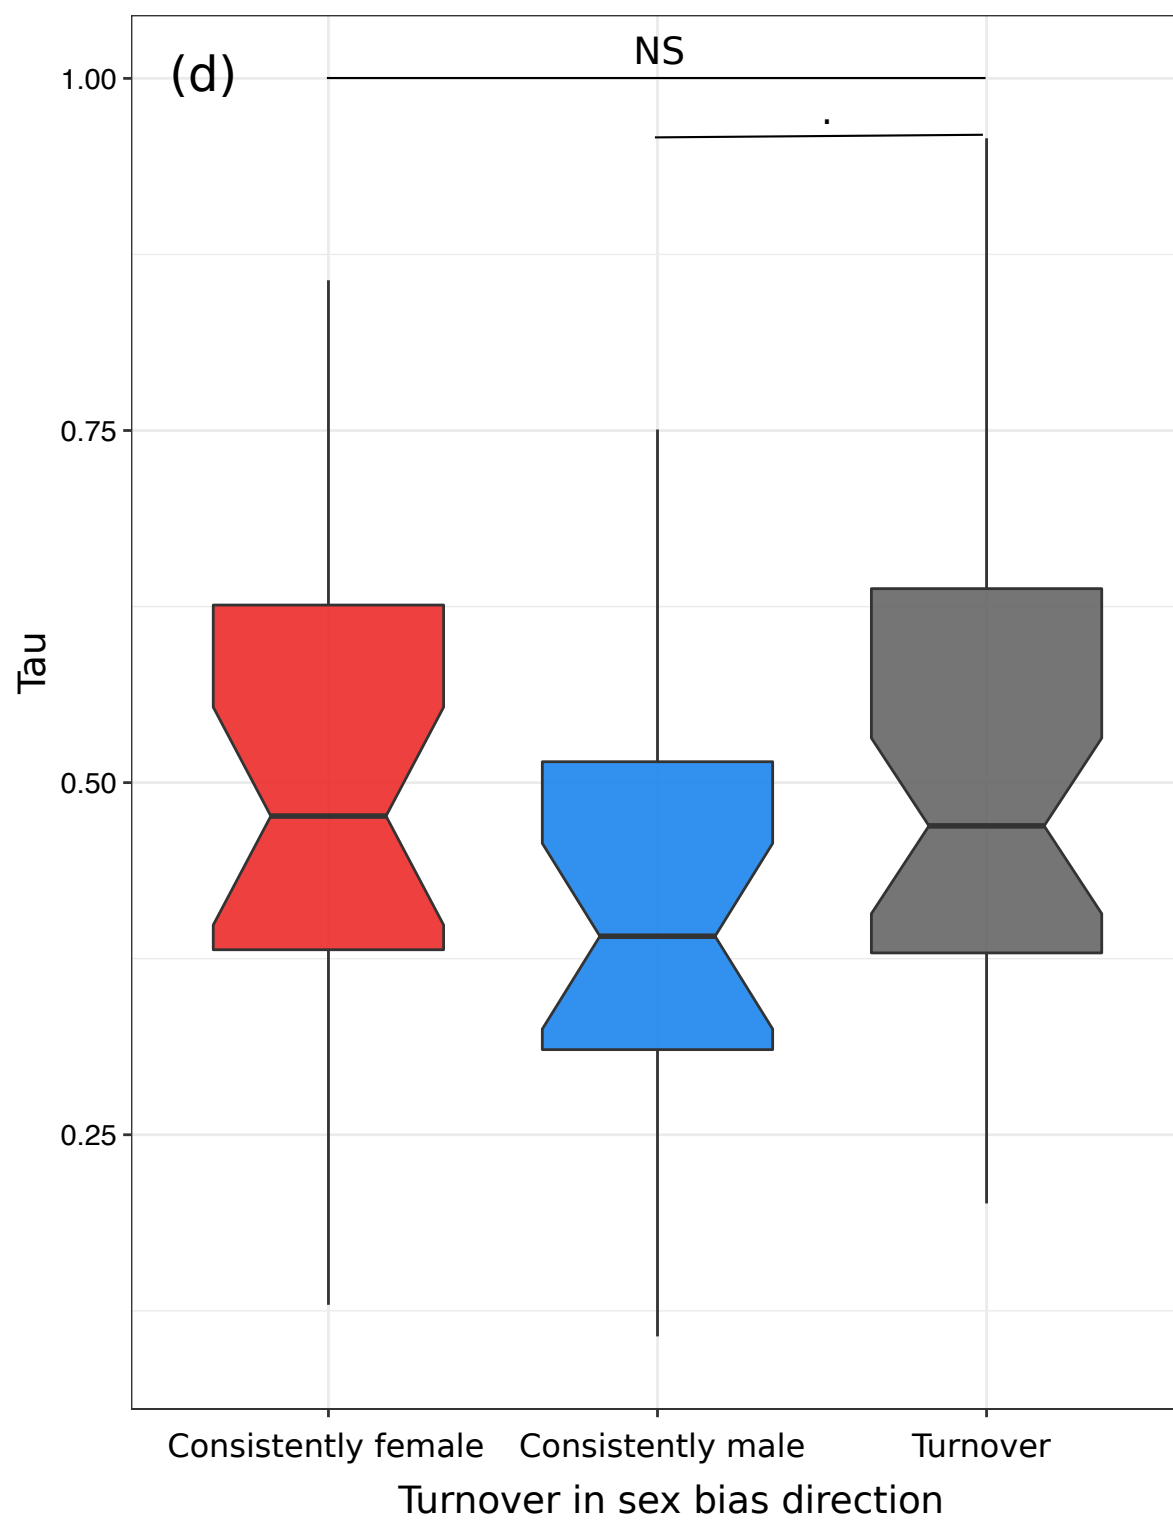

Supplement: s1 [file s1]

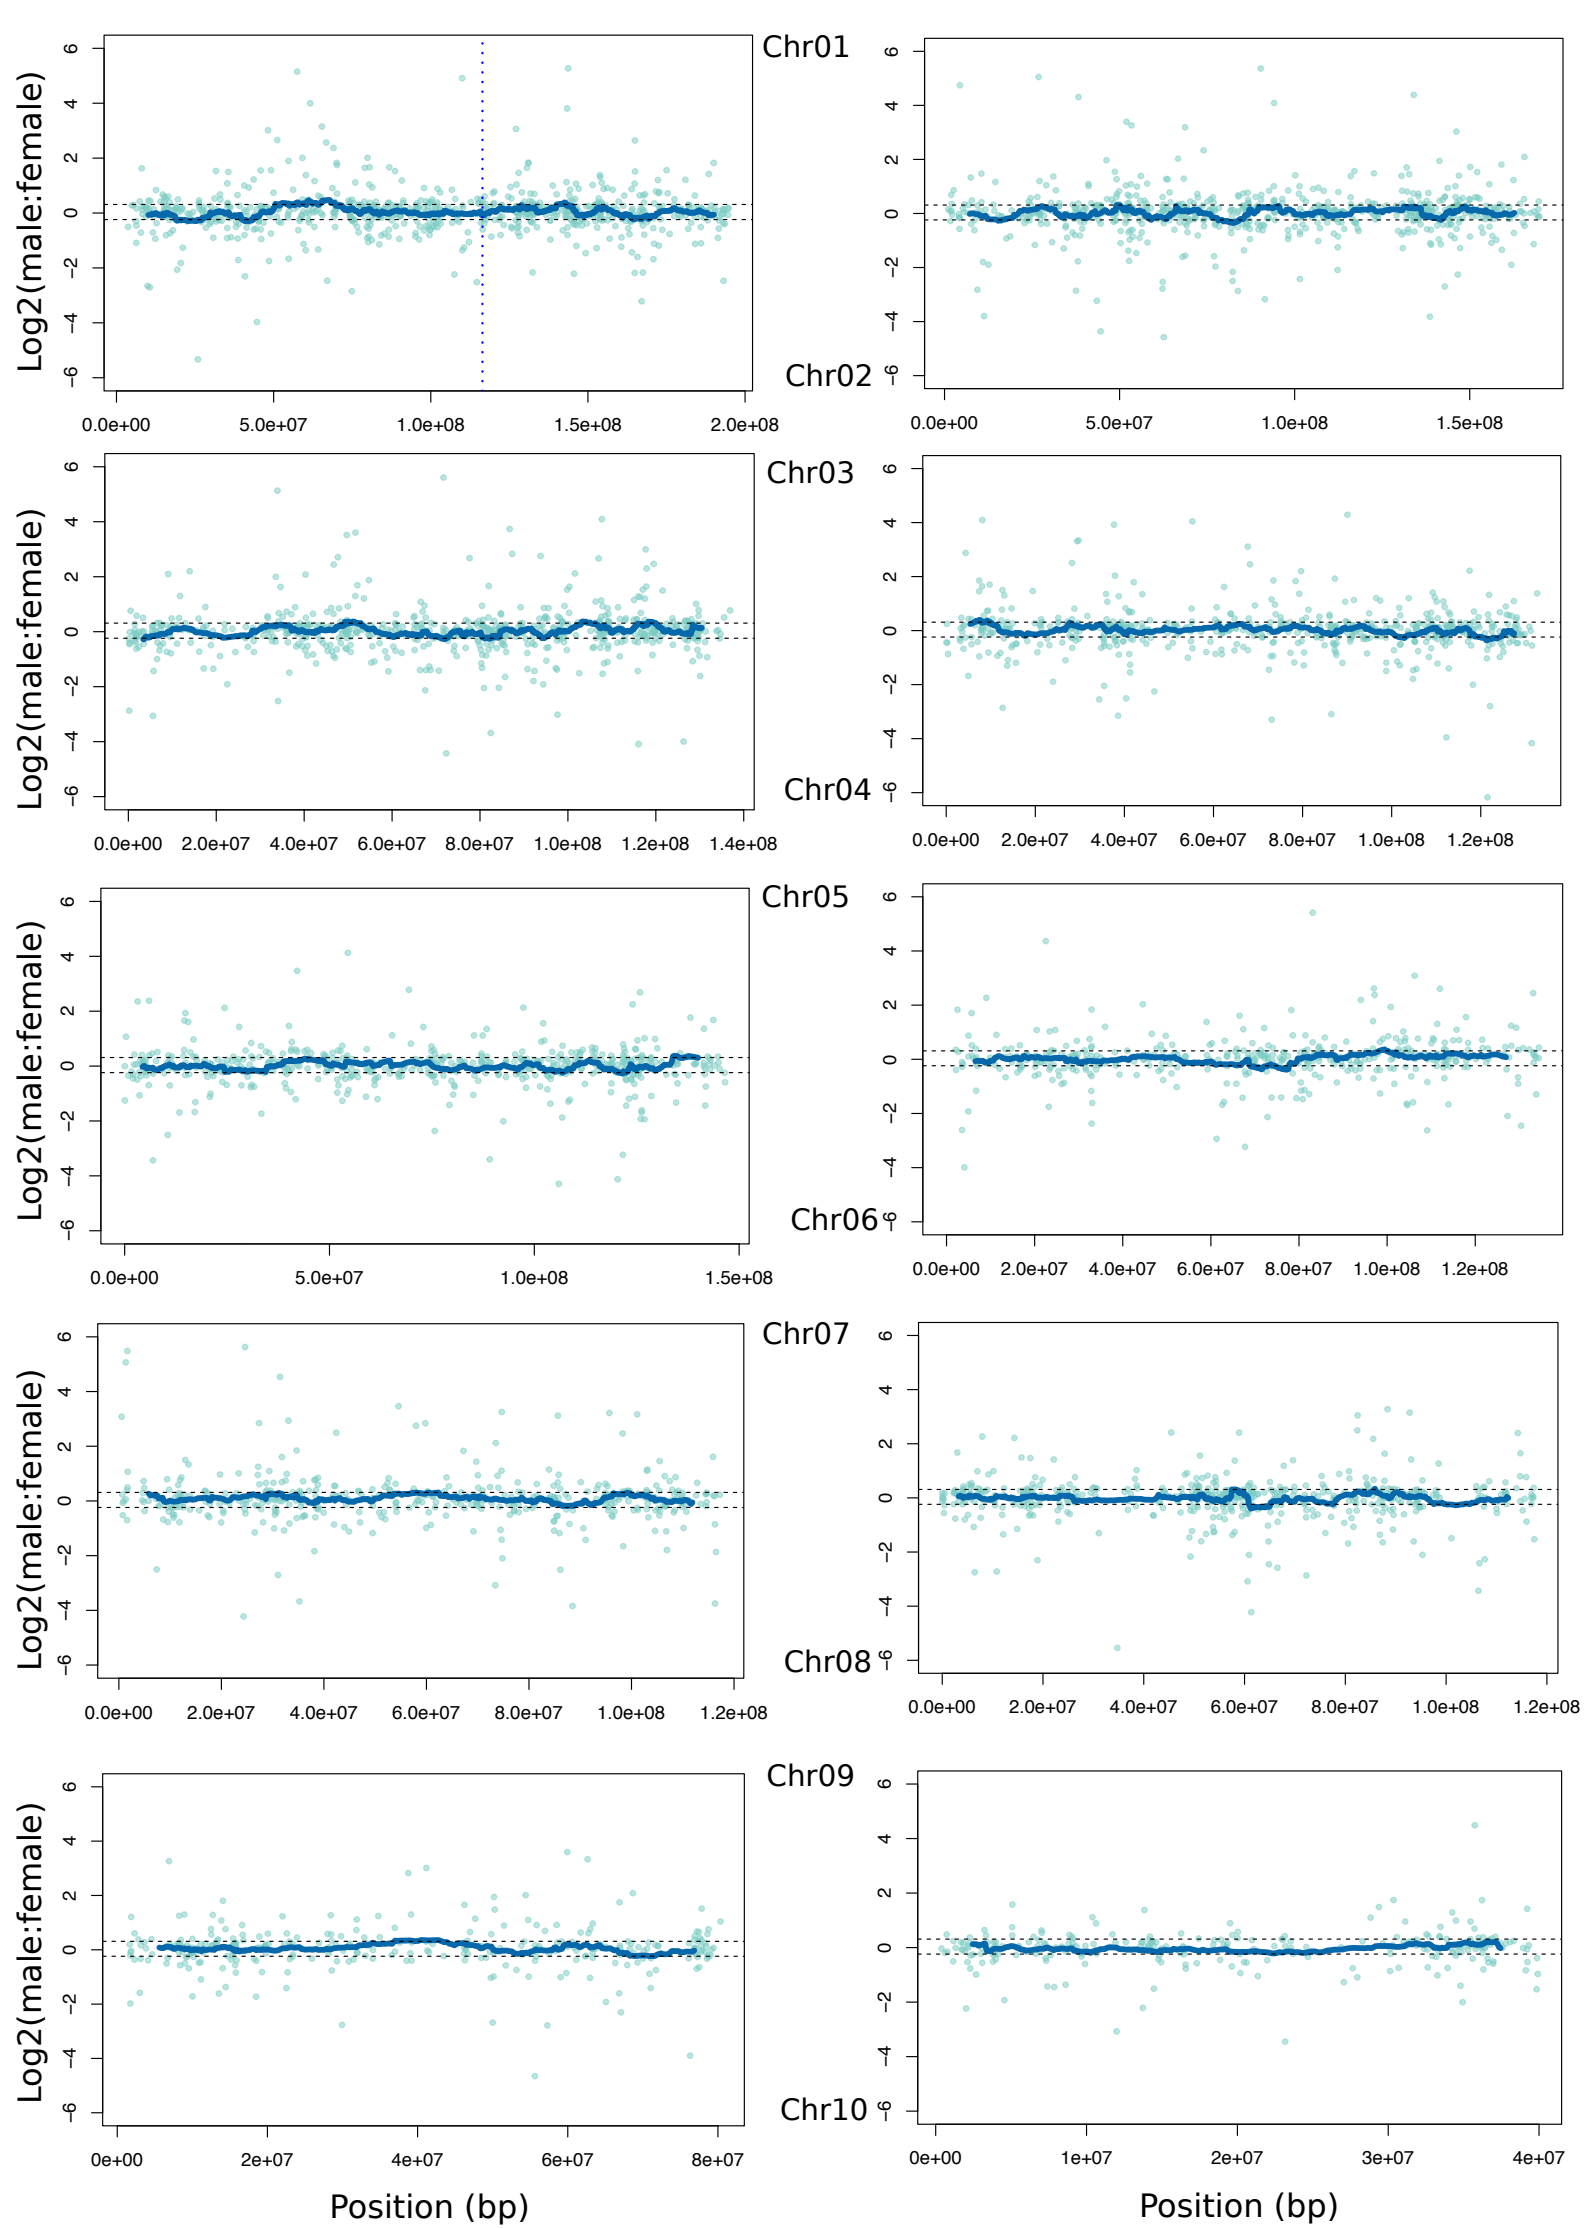

Supplement: s1 [file s1]

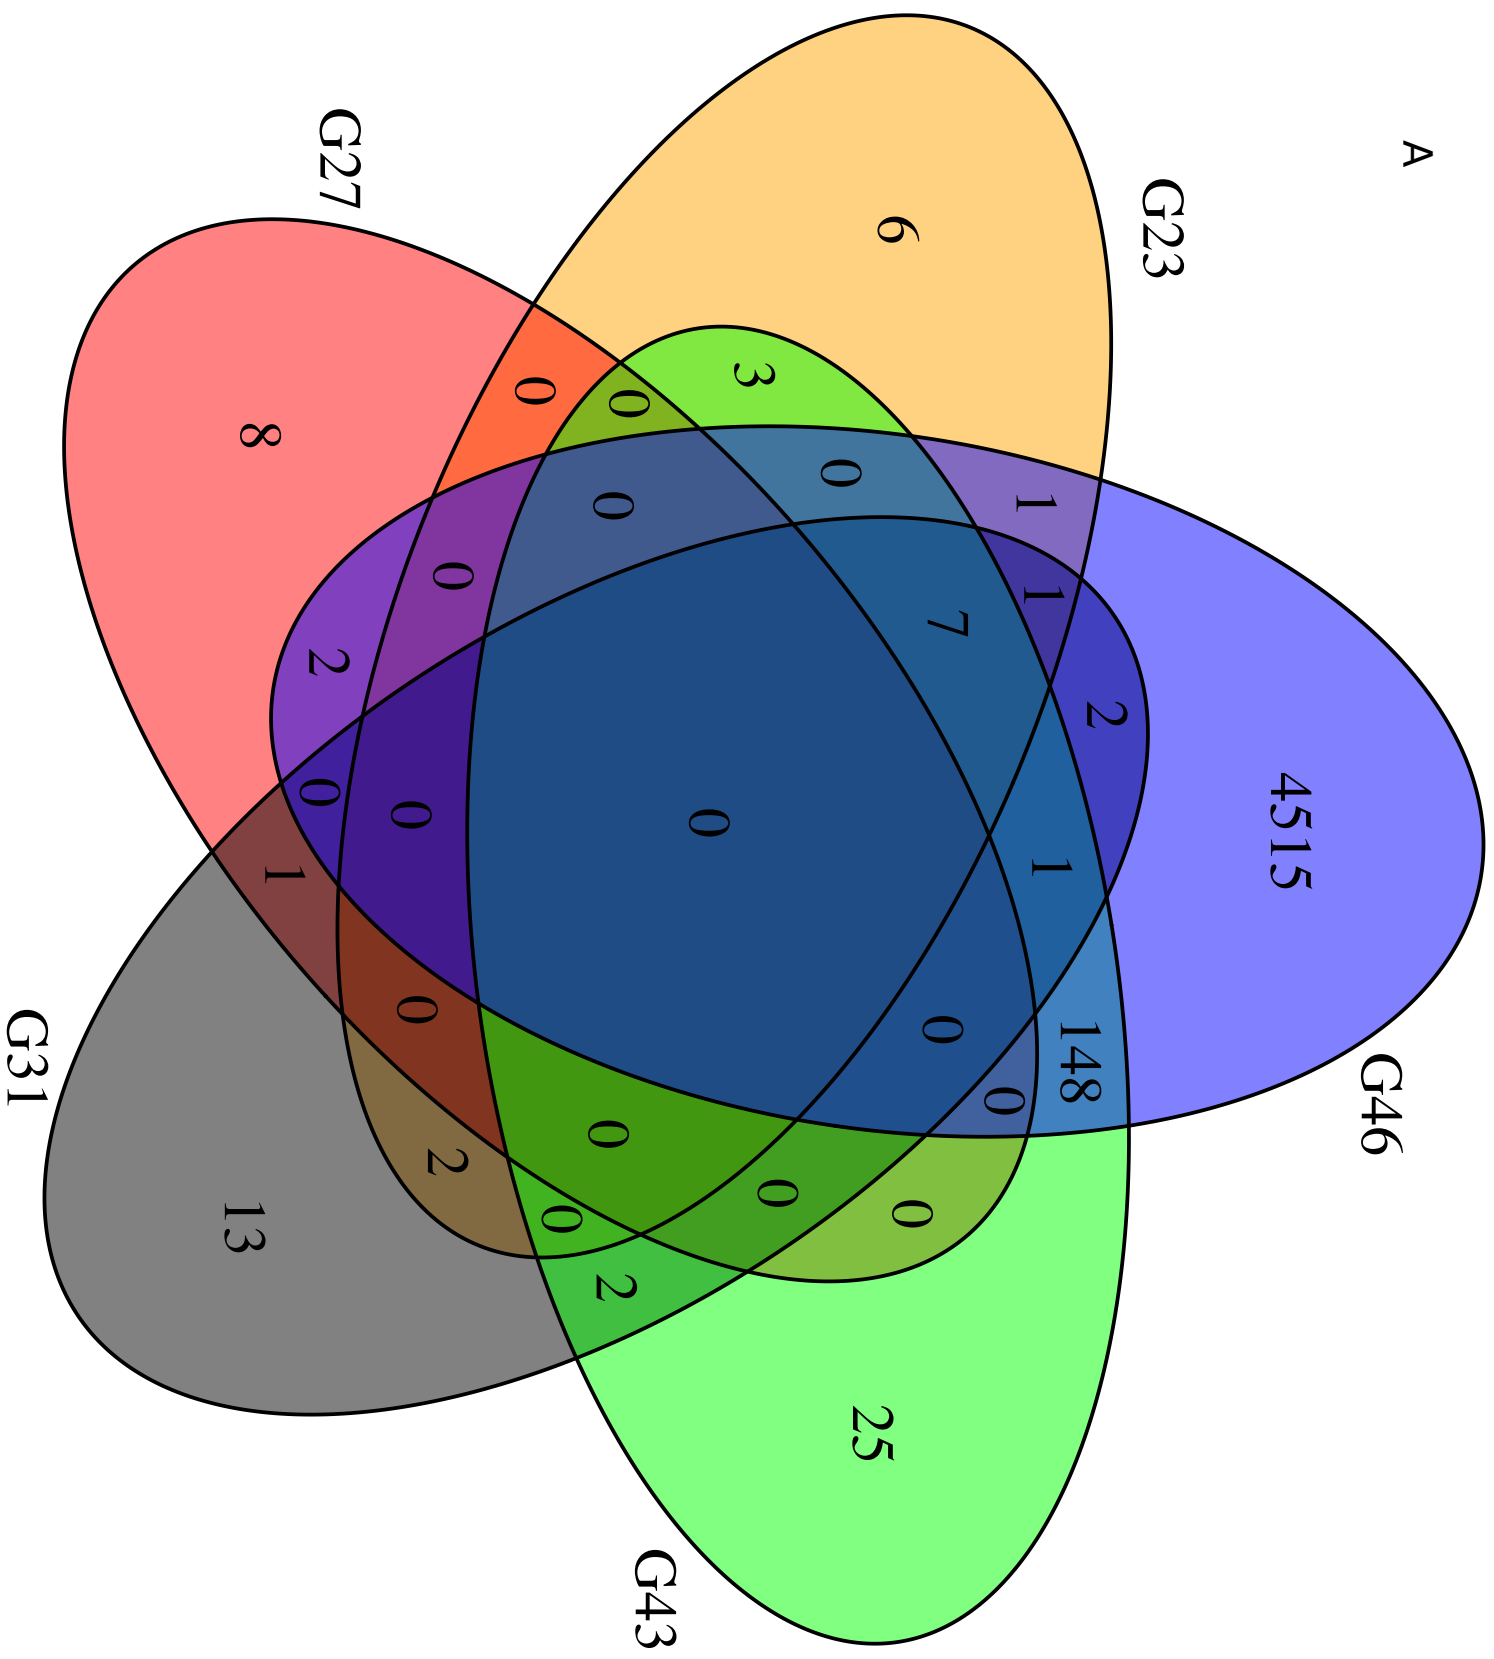

B

Brain

Gonad

Liver

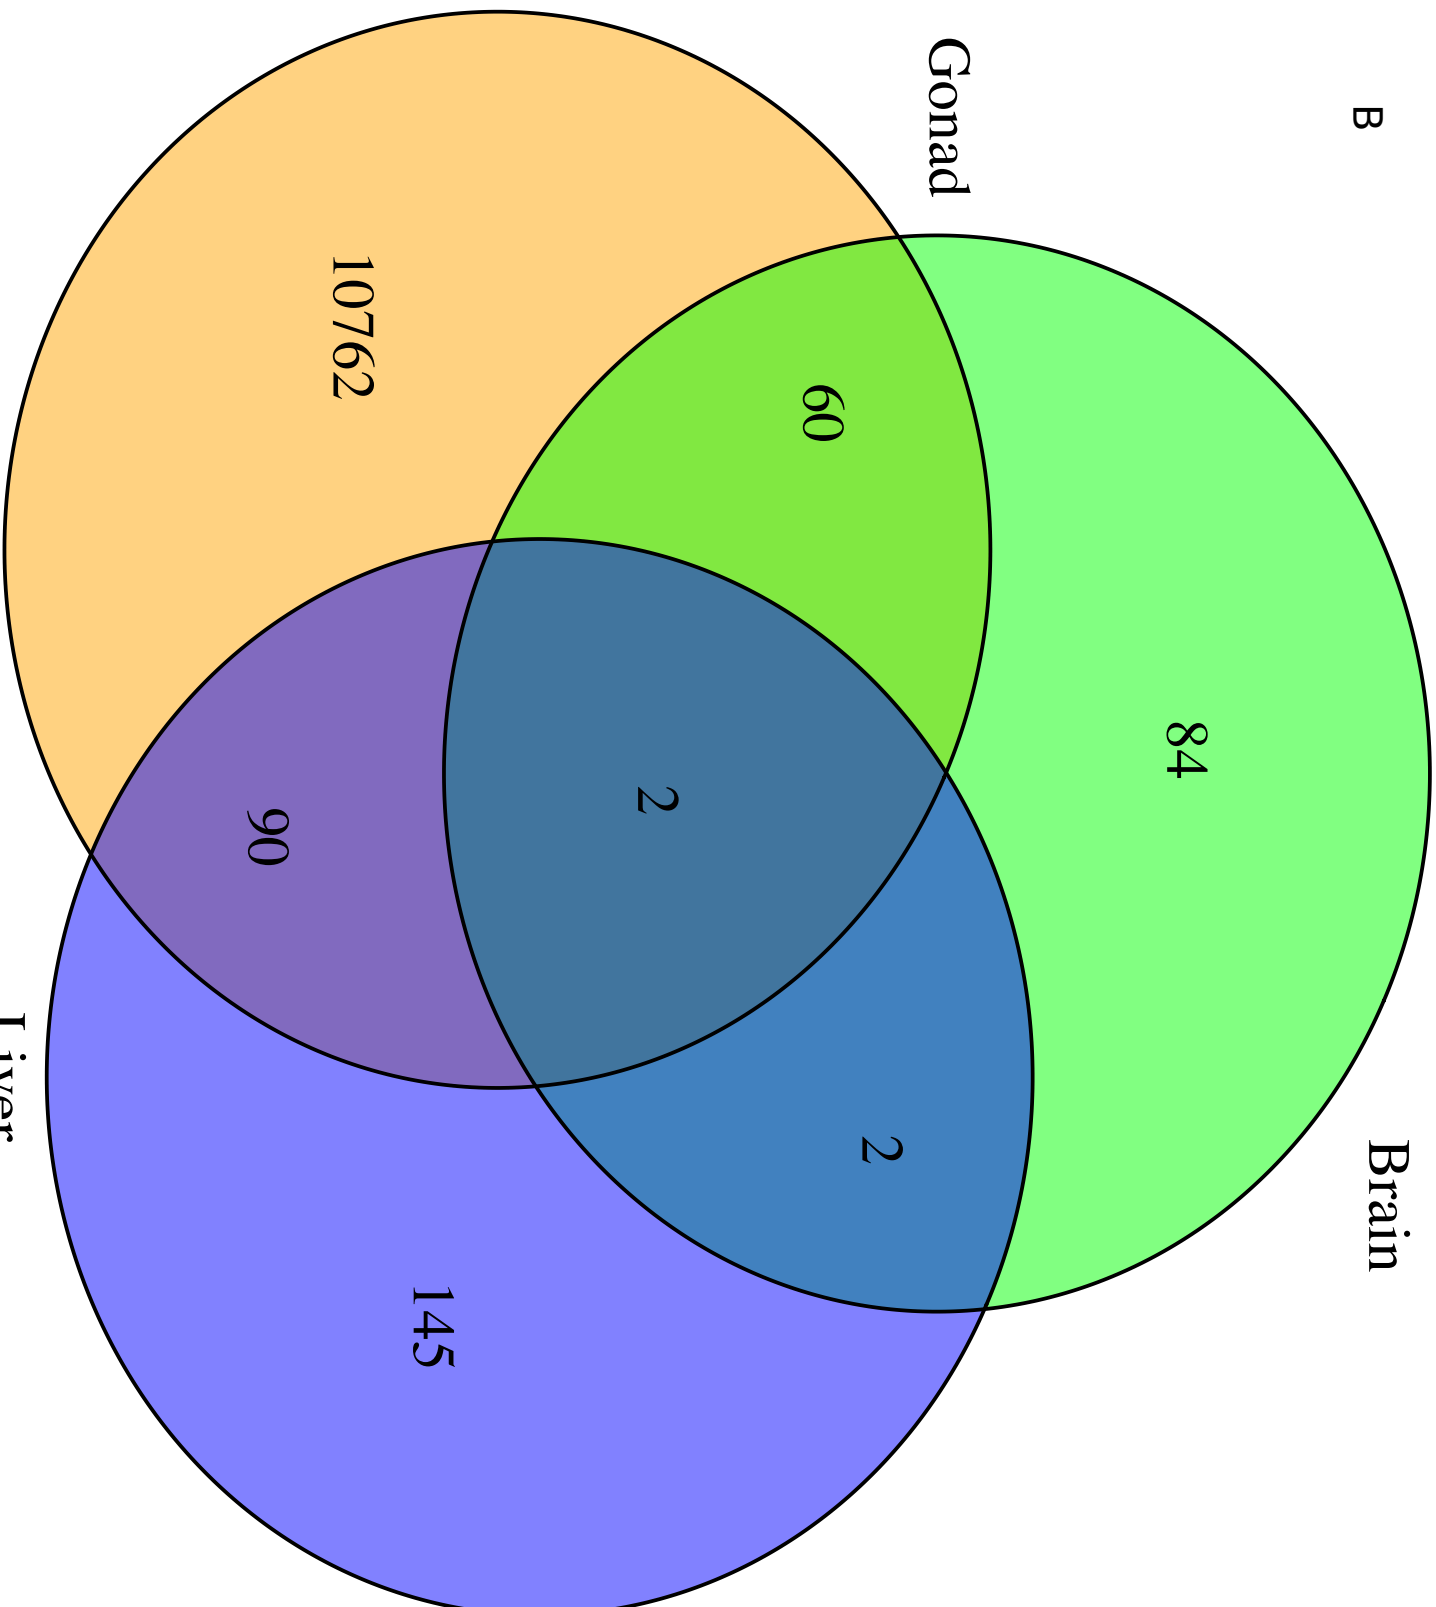

Supplement: s1 [file s1]

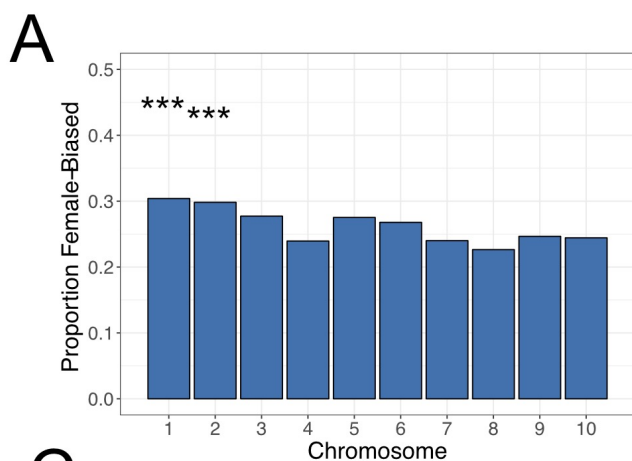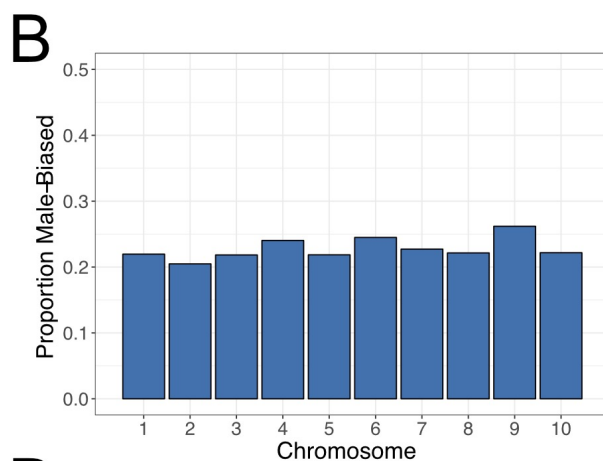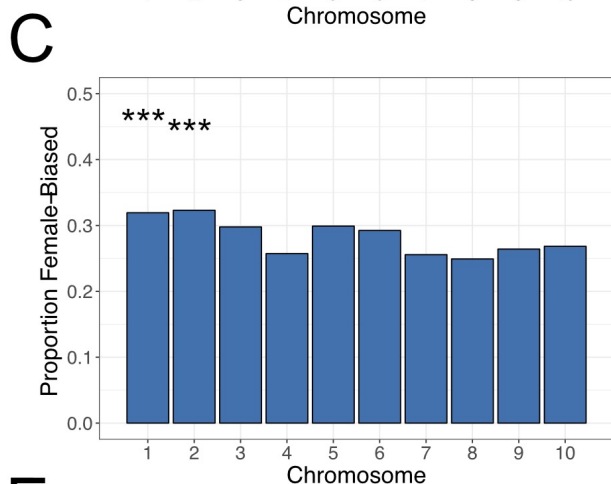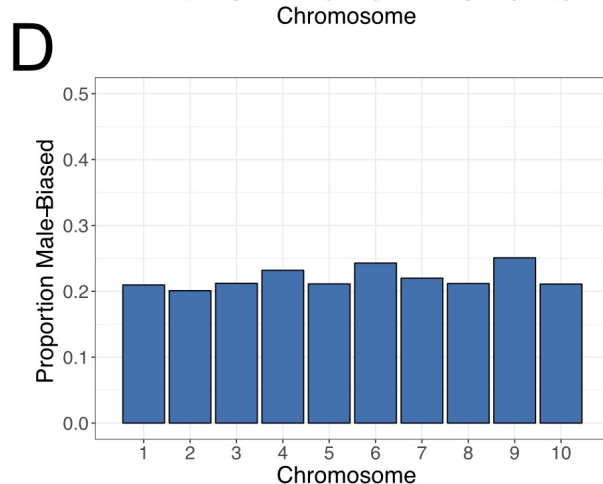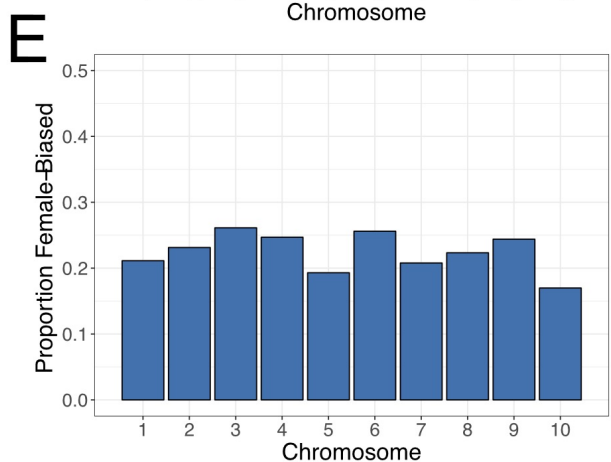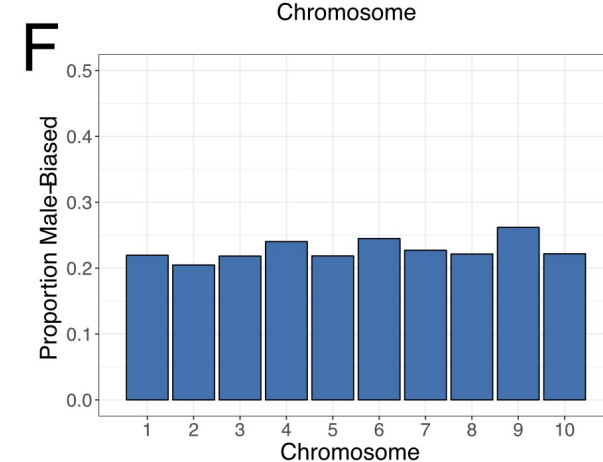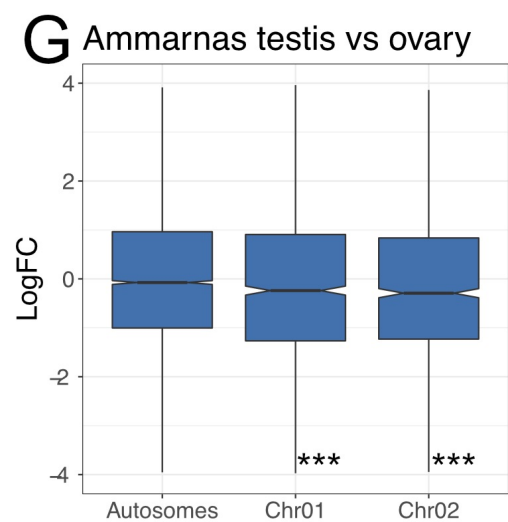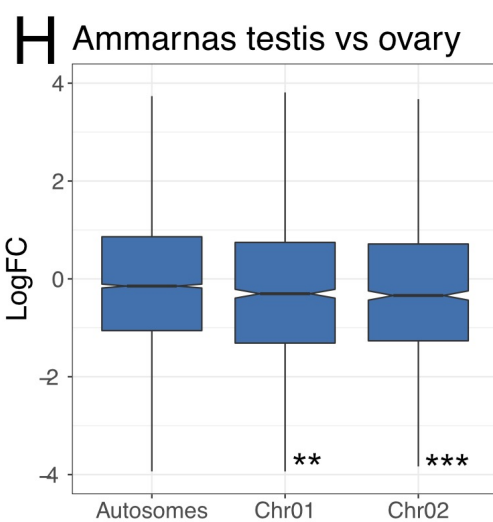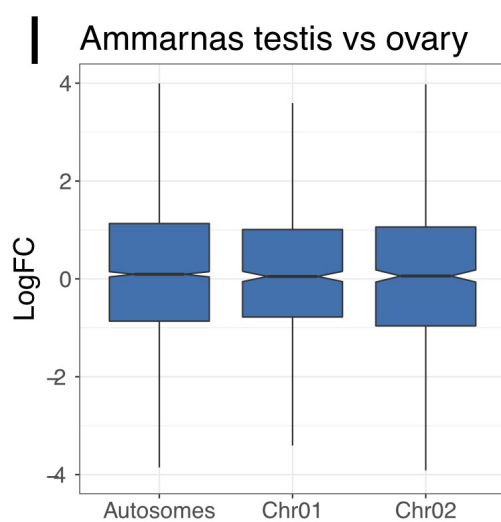

Supplement: s1 [file s1]

**G23**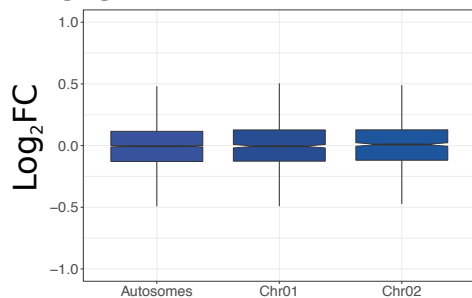**G27**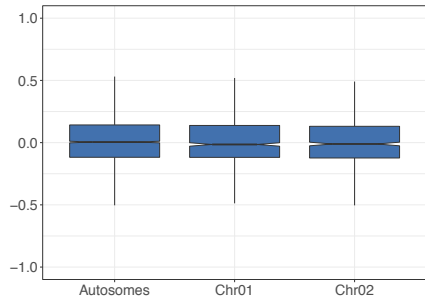**G31**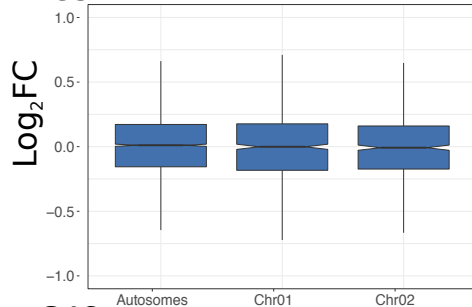**G43**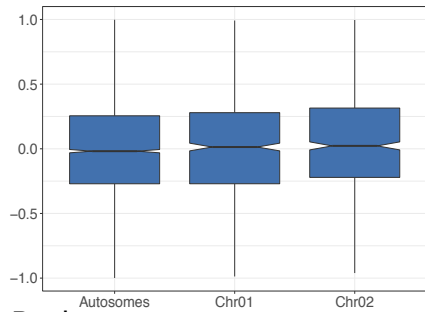**G46**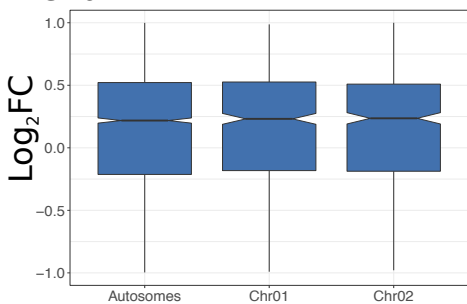**Brain**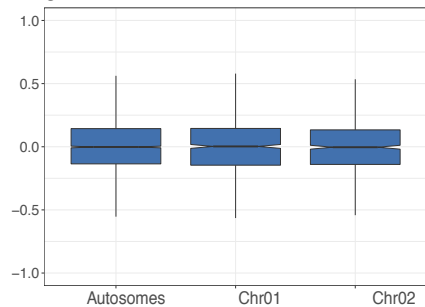**Gonad**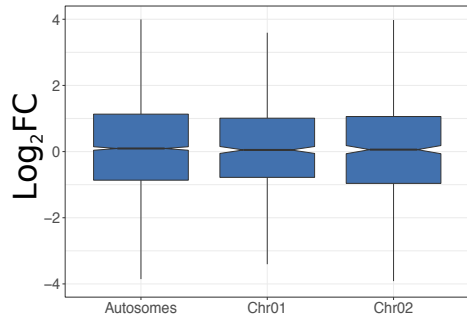**Liver**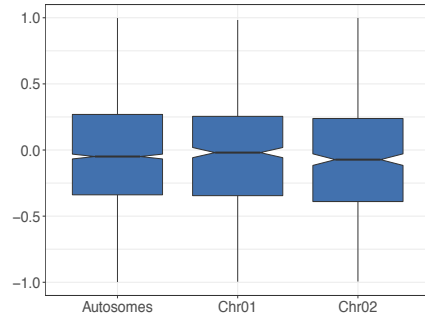

Supplement: s1 [file s1]

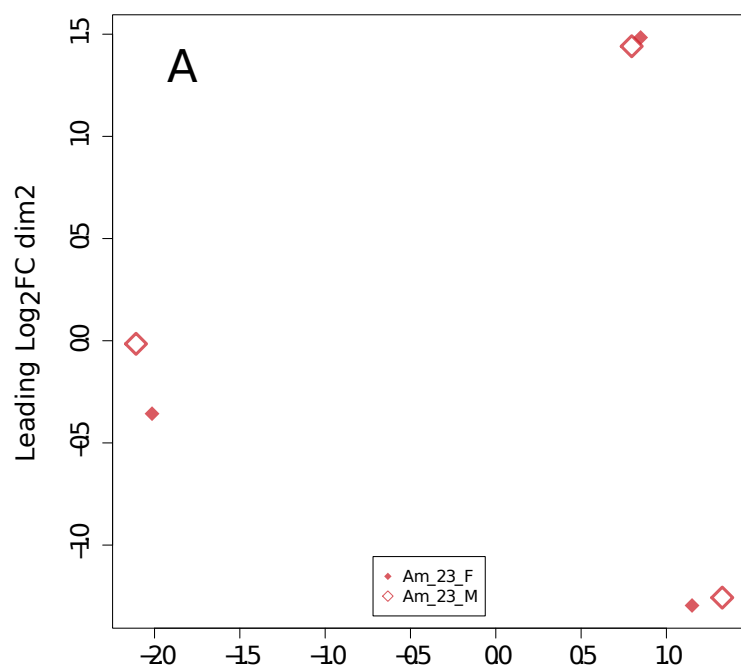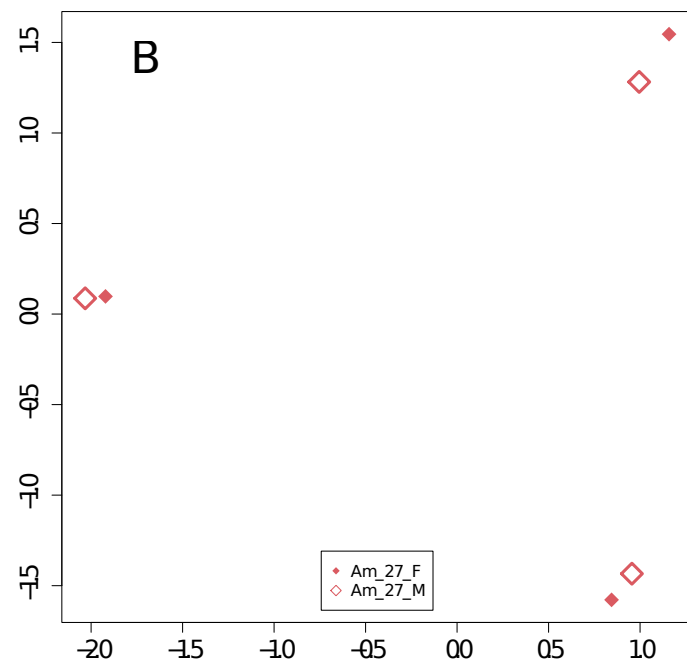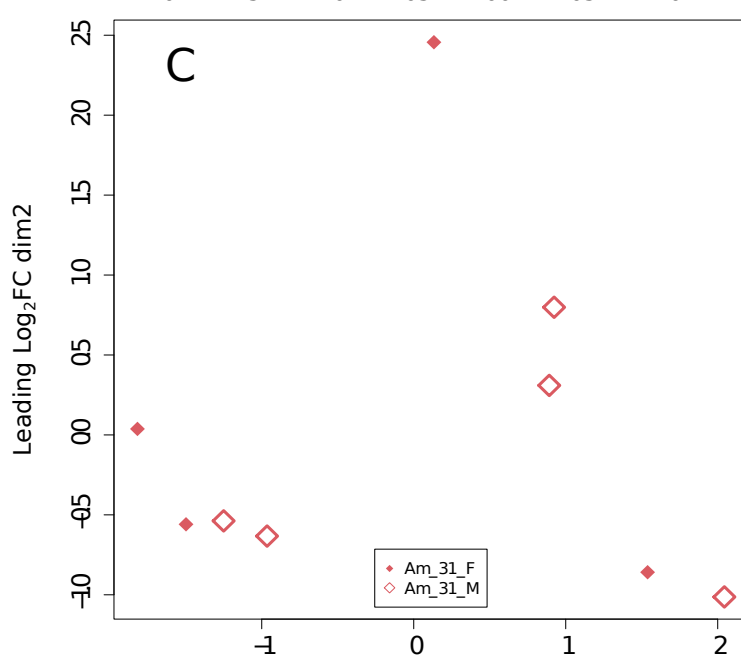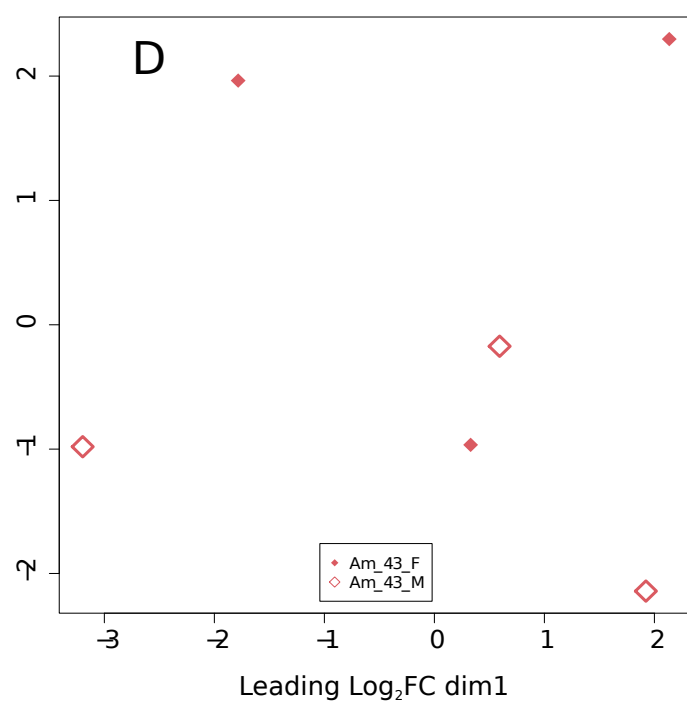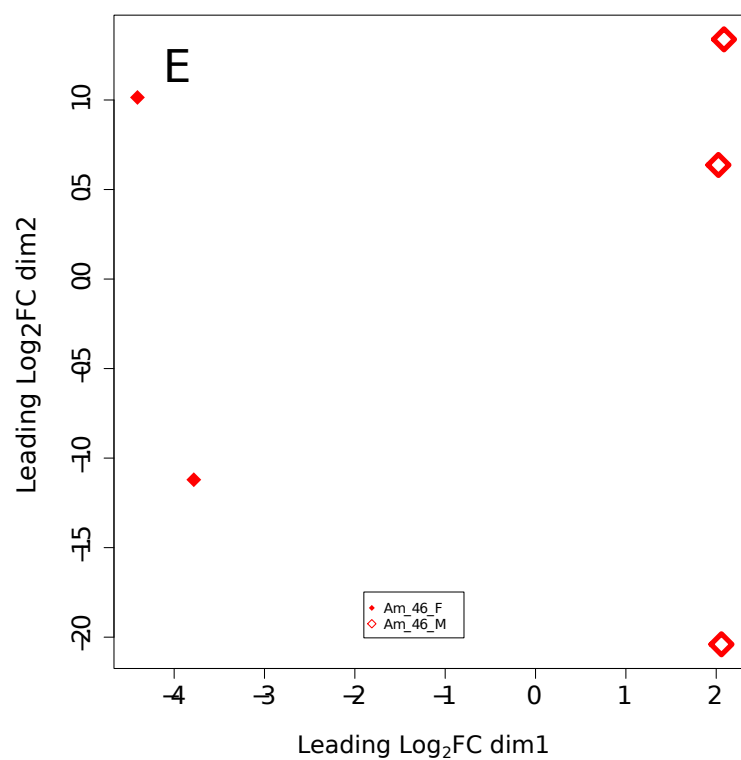

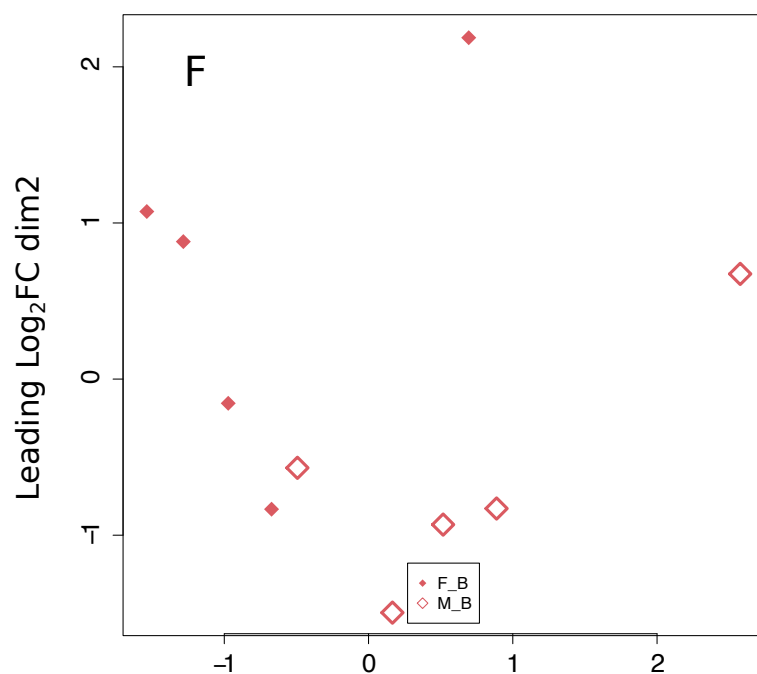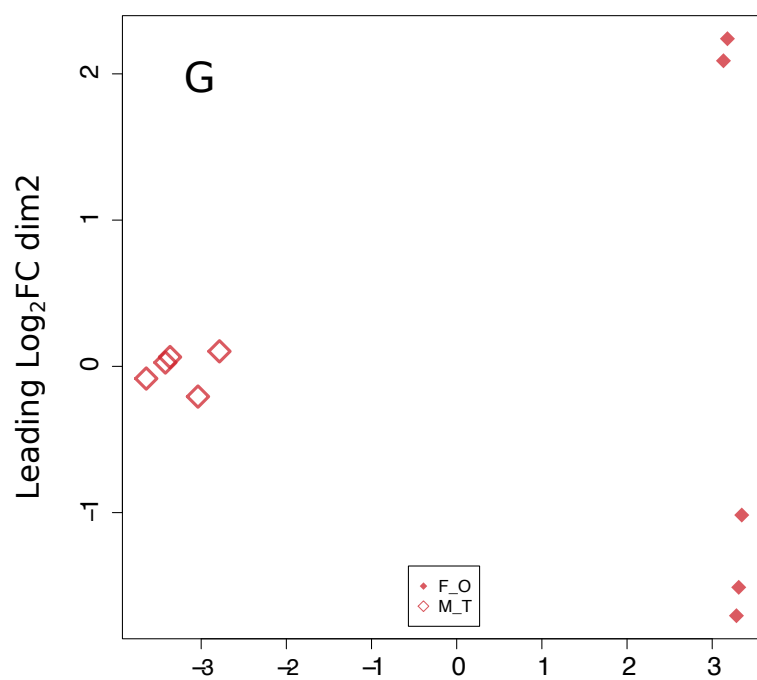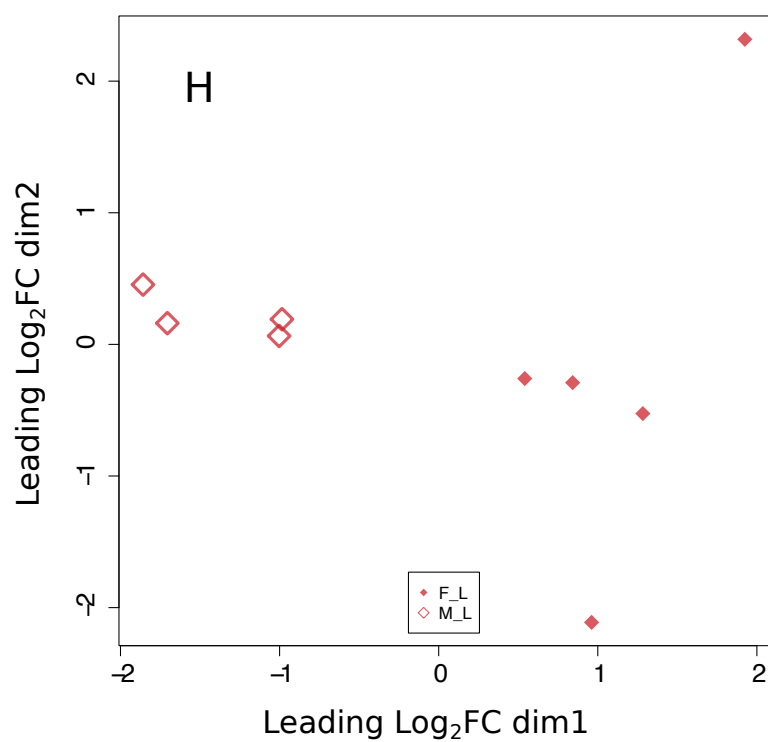

Supplement: s1 [file s1]

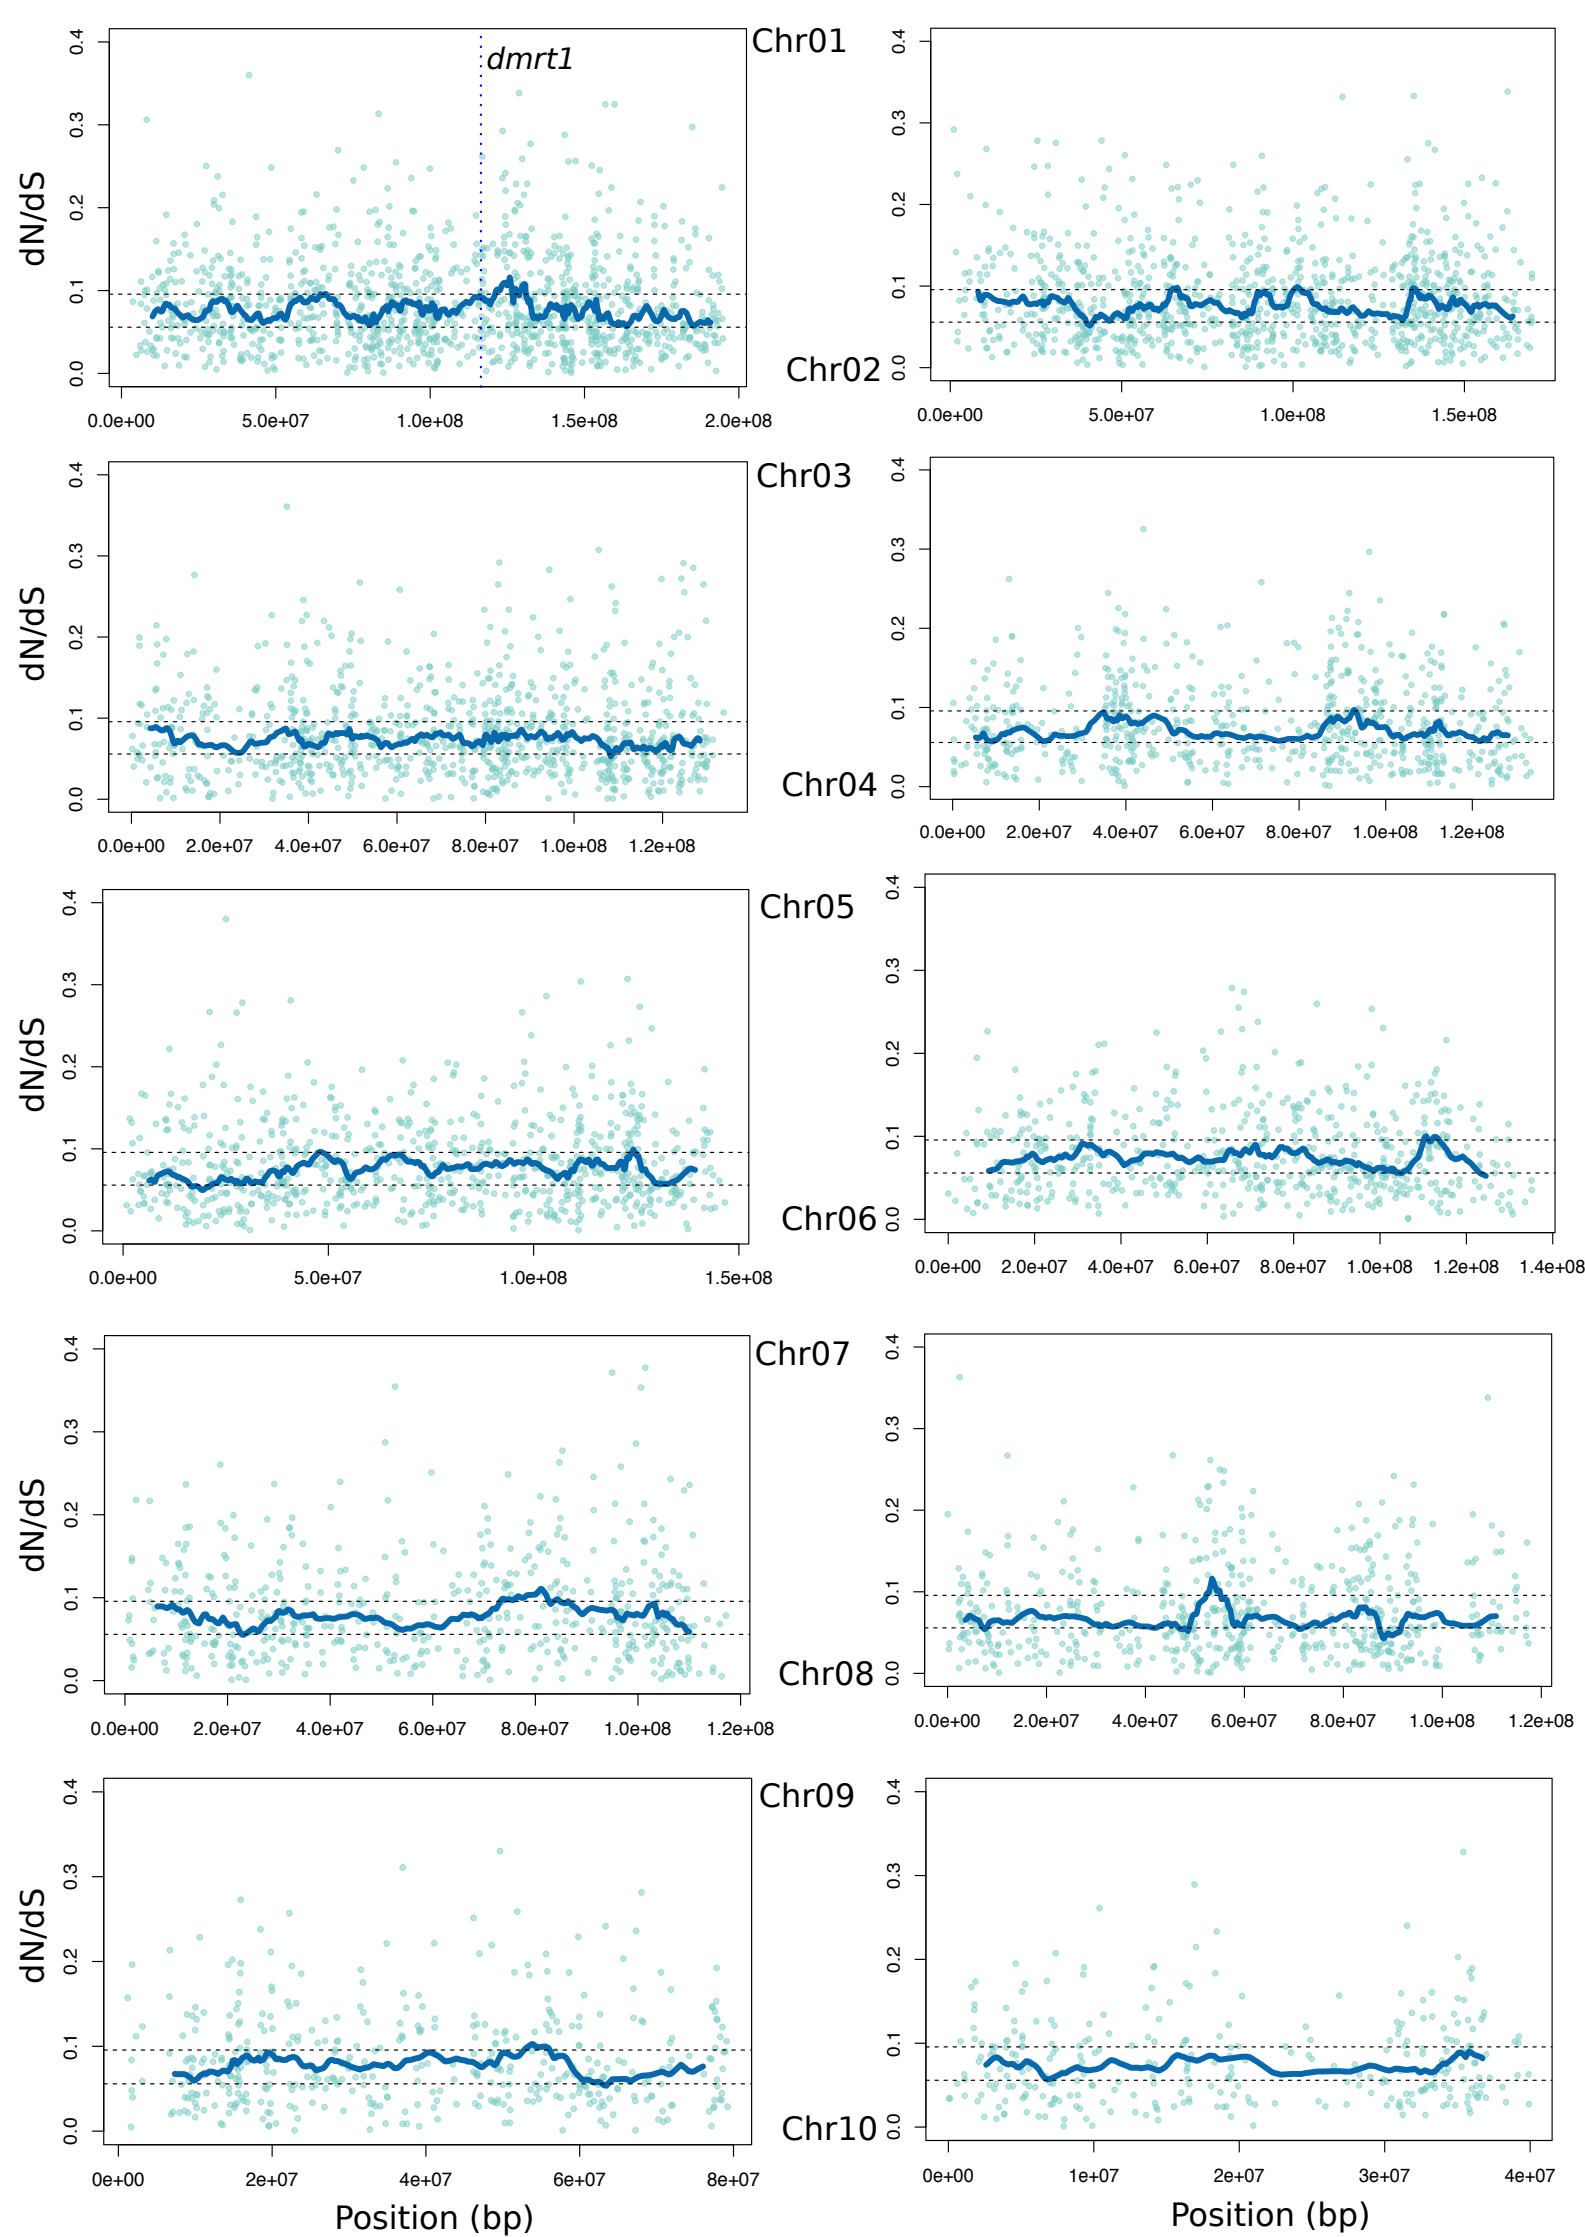

Supplement: s1 [file s1]

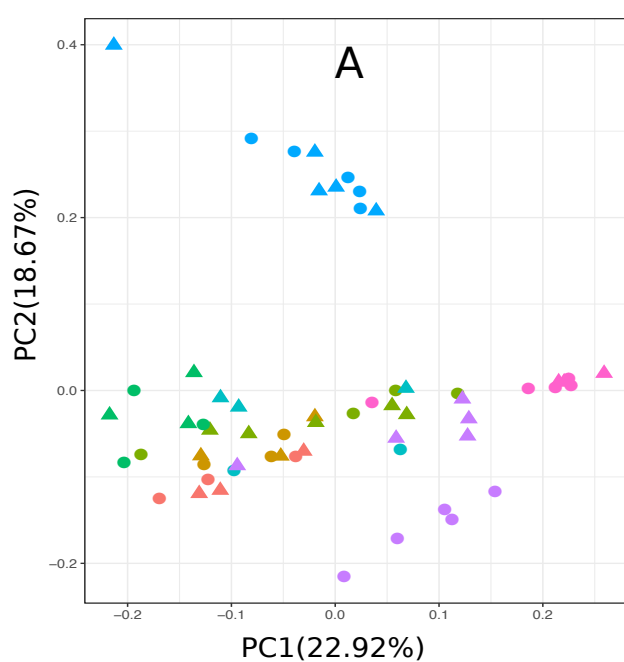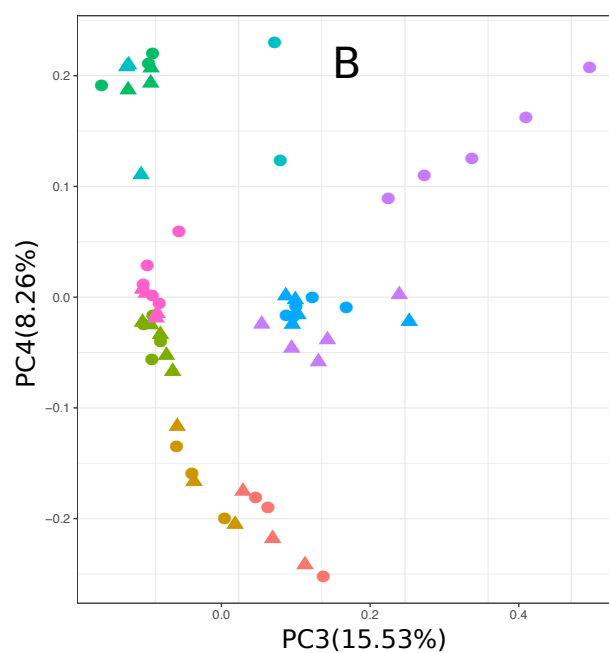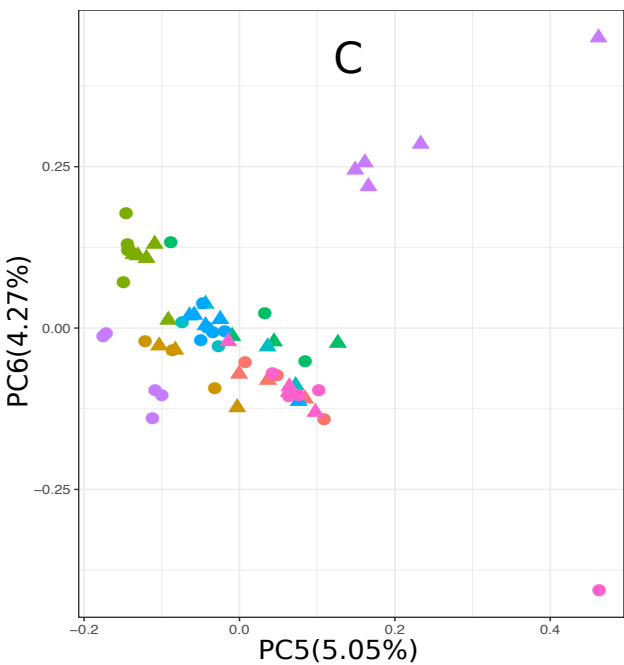

Supplement: s1 [file s1]

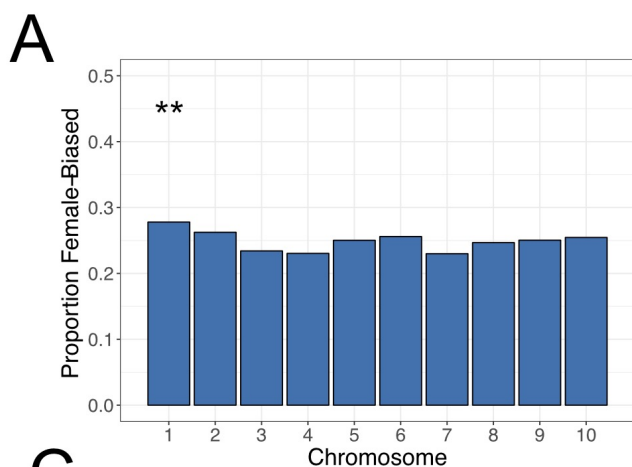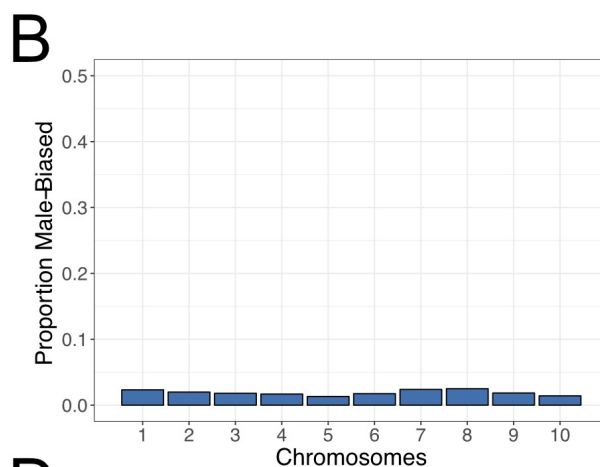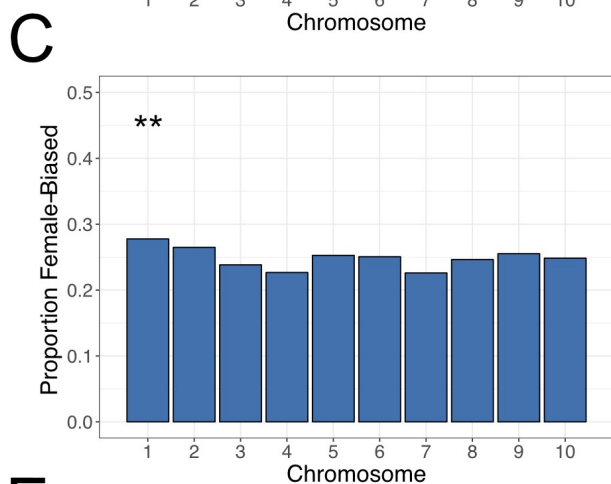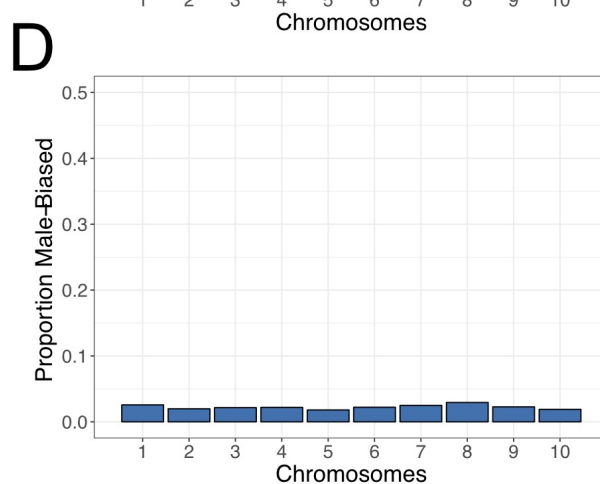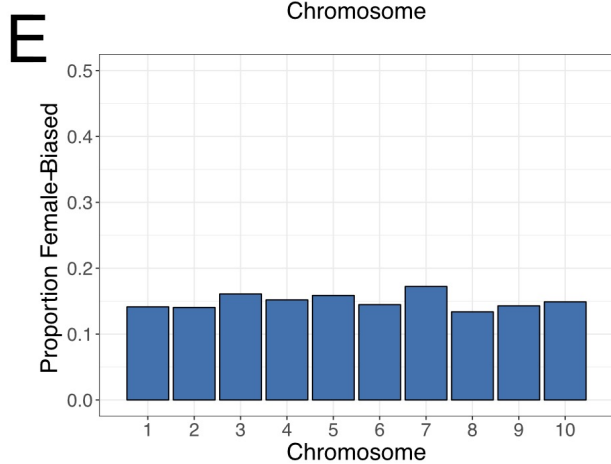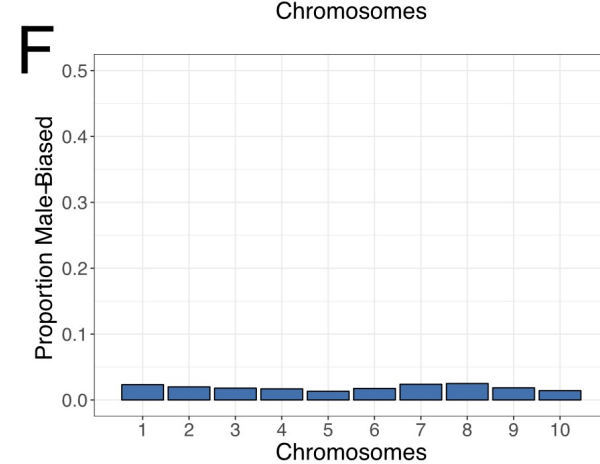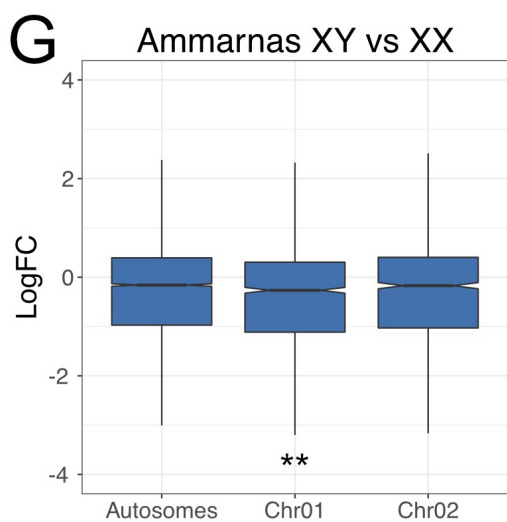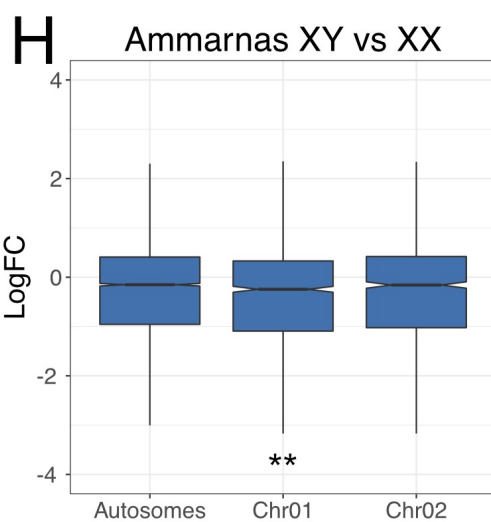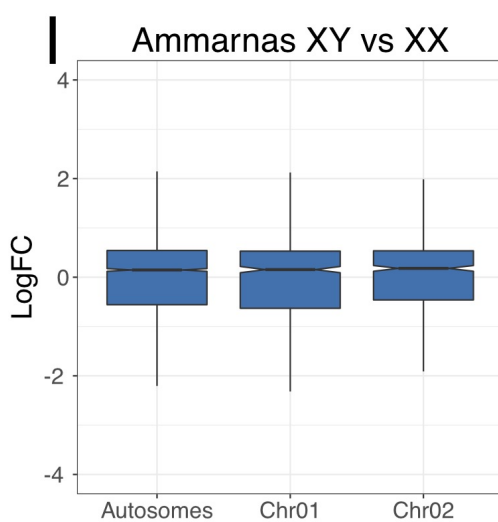

Supplement: s1 [file s1]

# A female-biased genes

G23

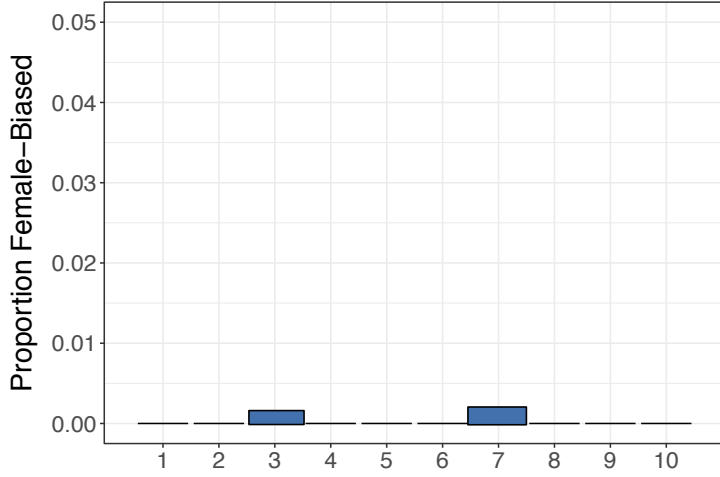

G27

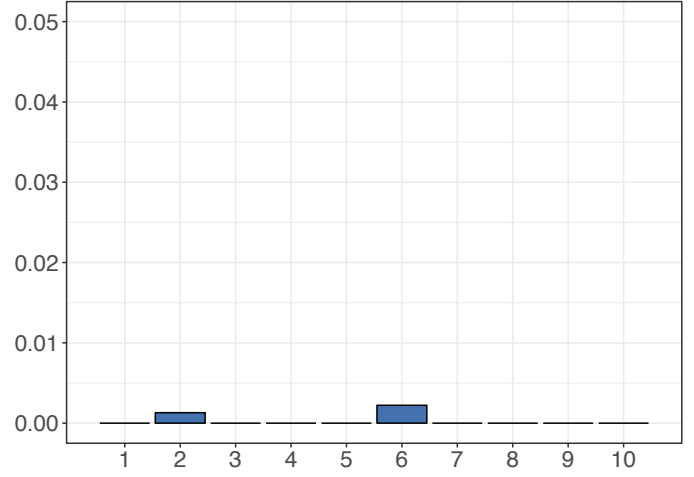

G31

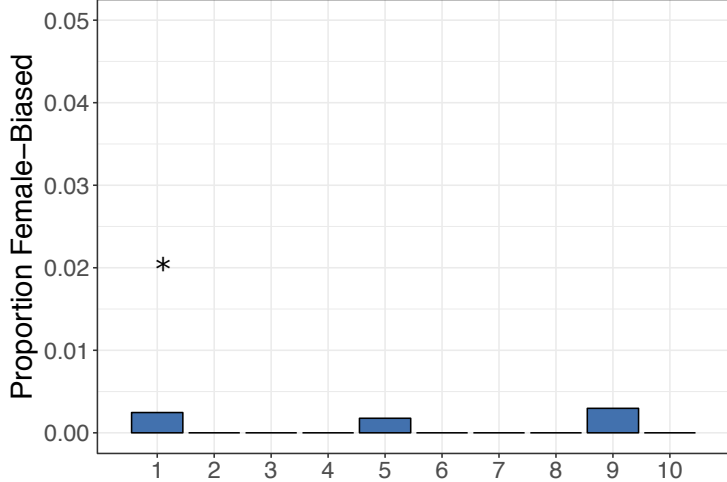

G43

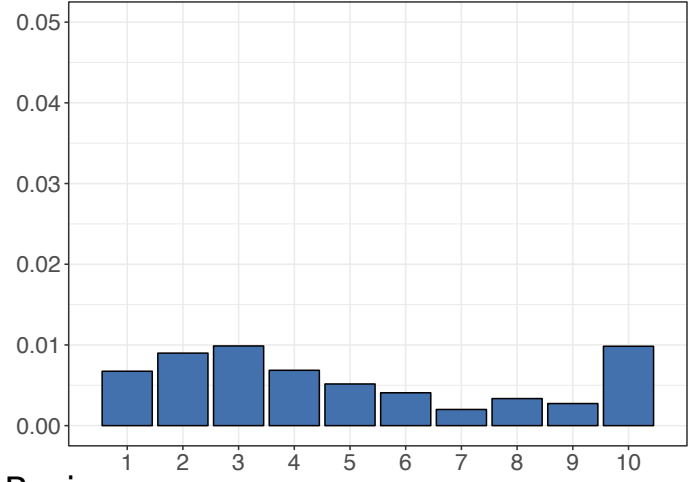

G46

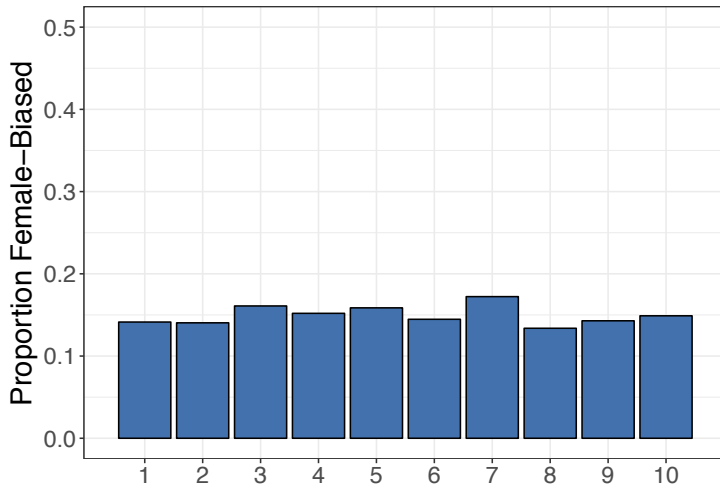

Brain

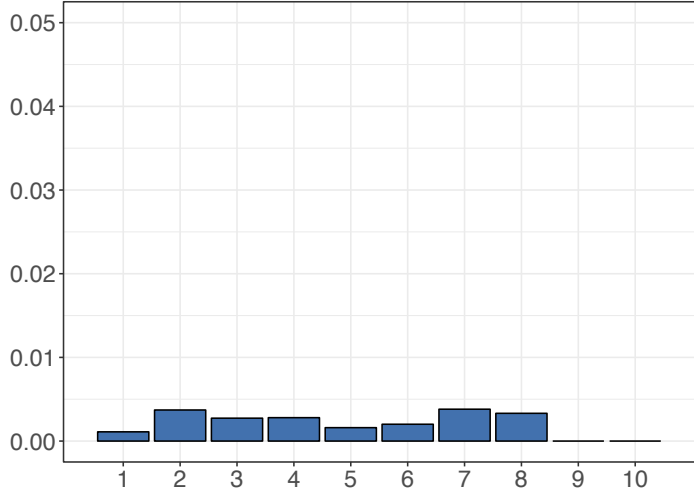

Gonad

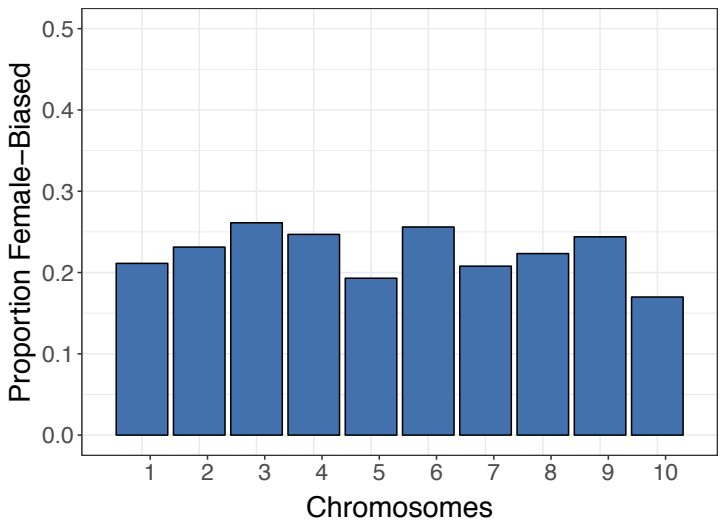

Liver

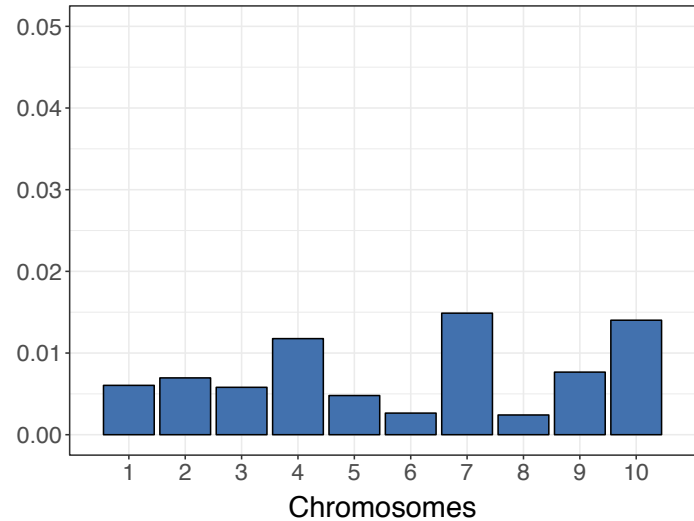

## B male-biased genes

G23

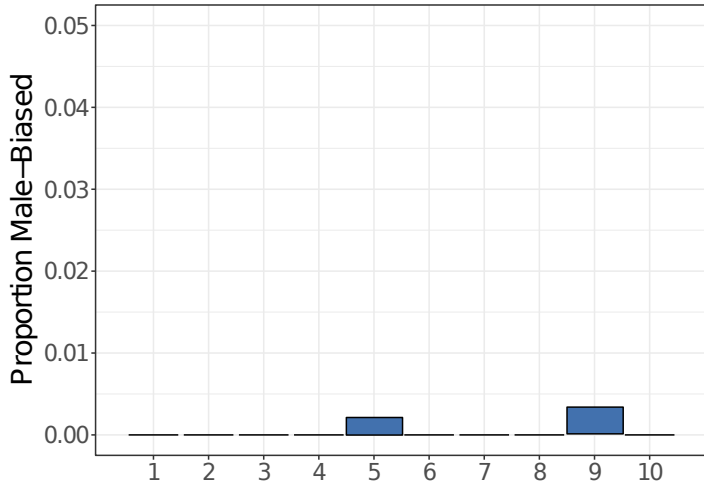

G27

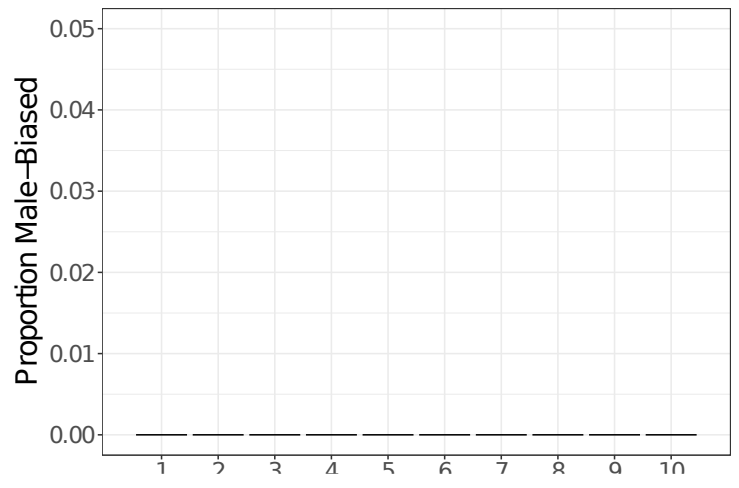

G31

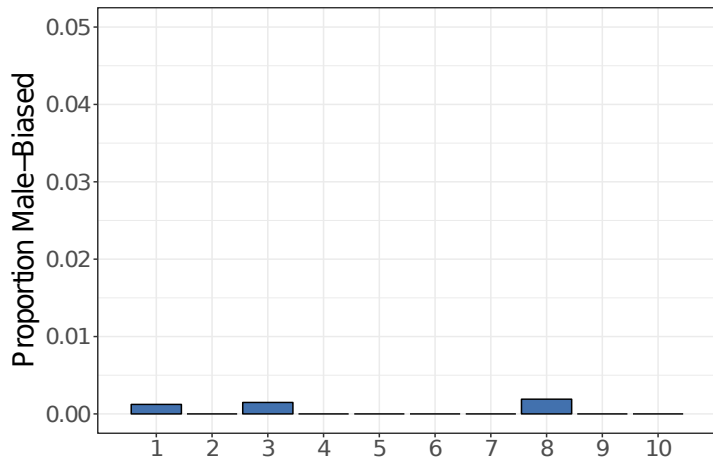

G43

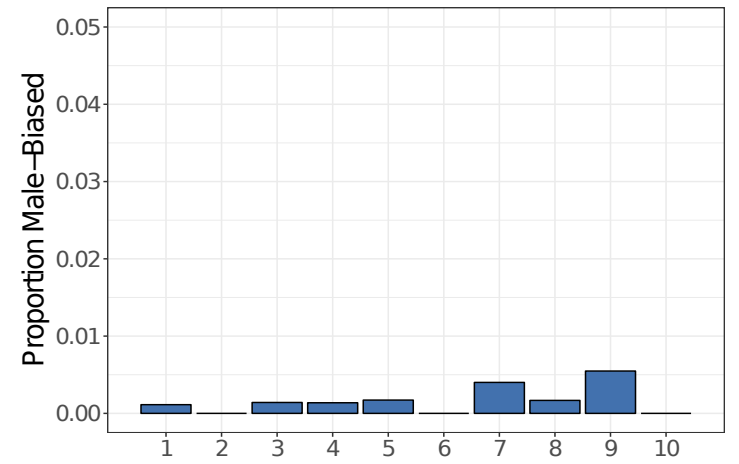

G46

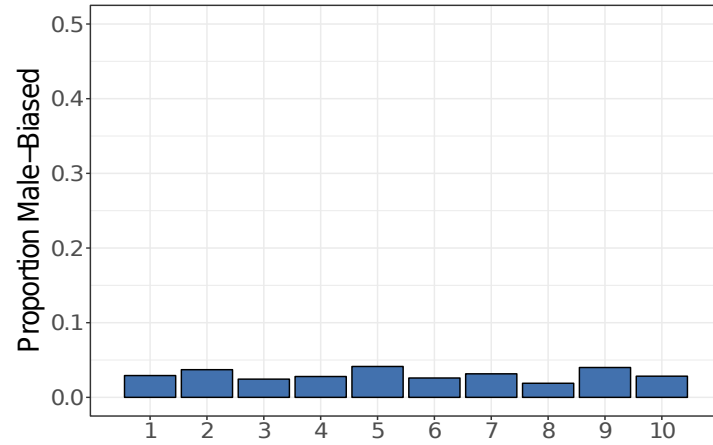

Brain

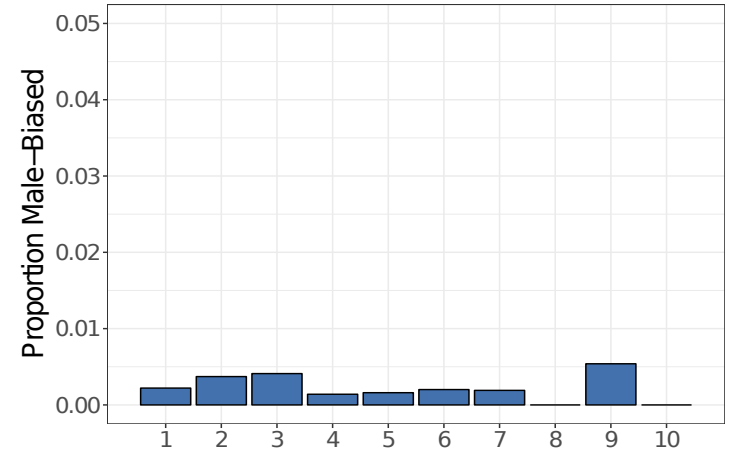

Gonad

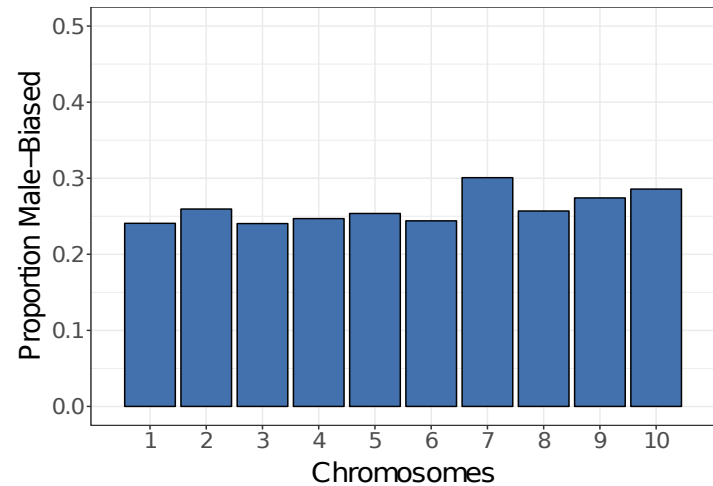

Liver

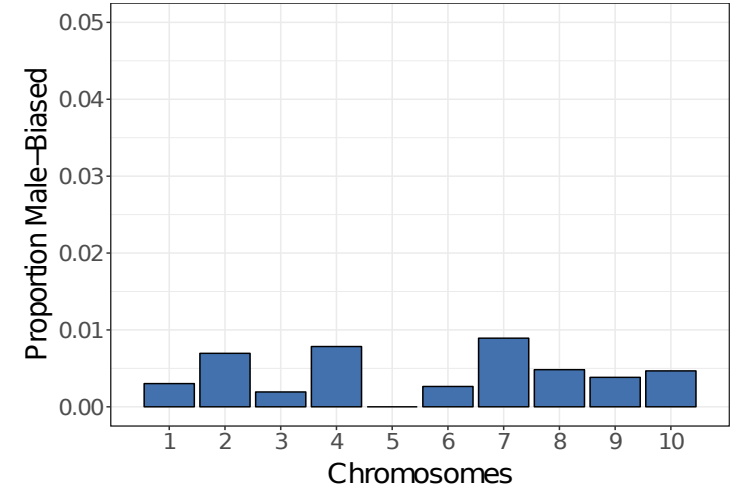

Supplement: s1 [file s1]

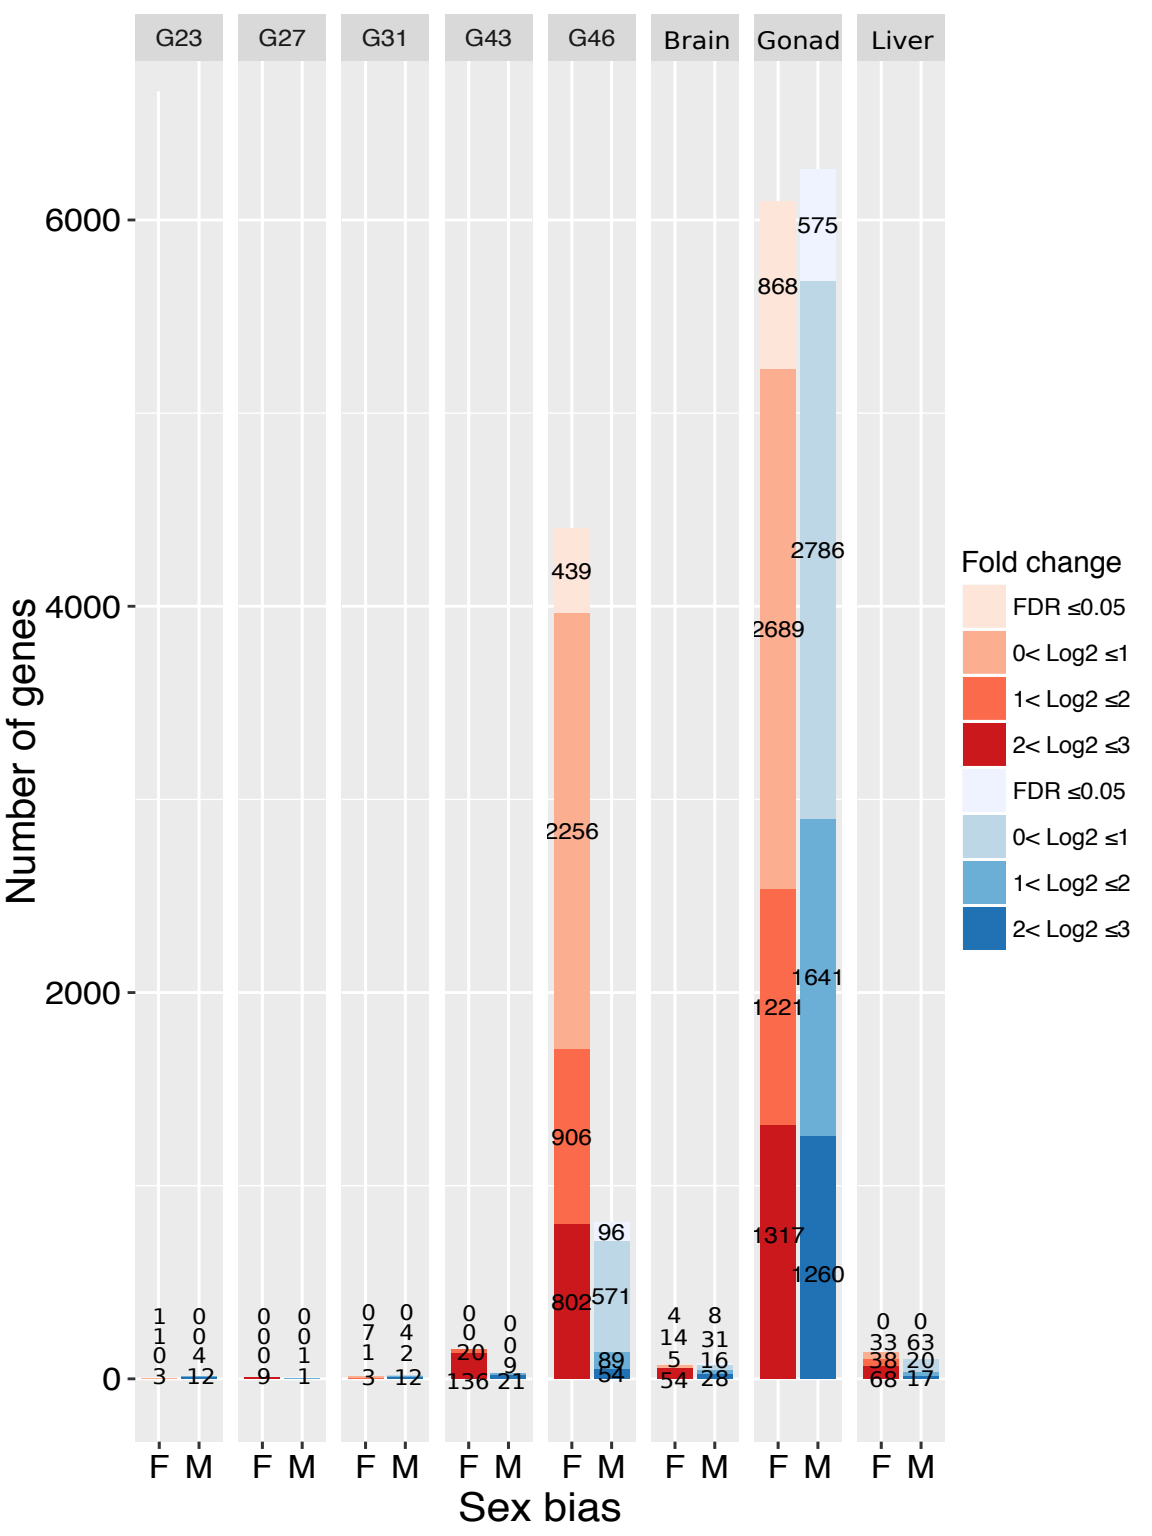

Supplement: s1 [file s1]

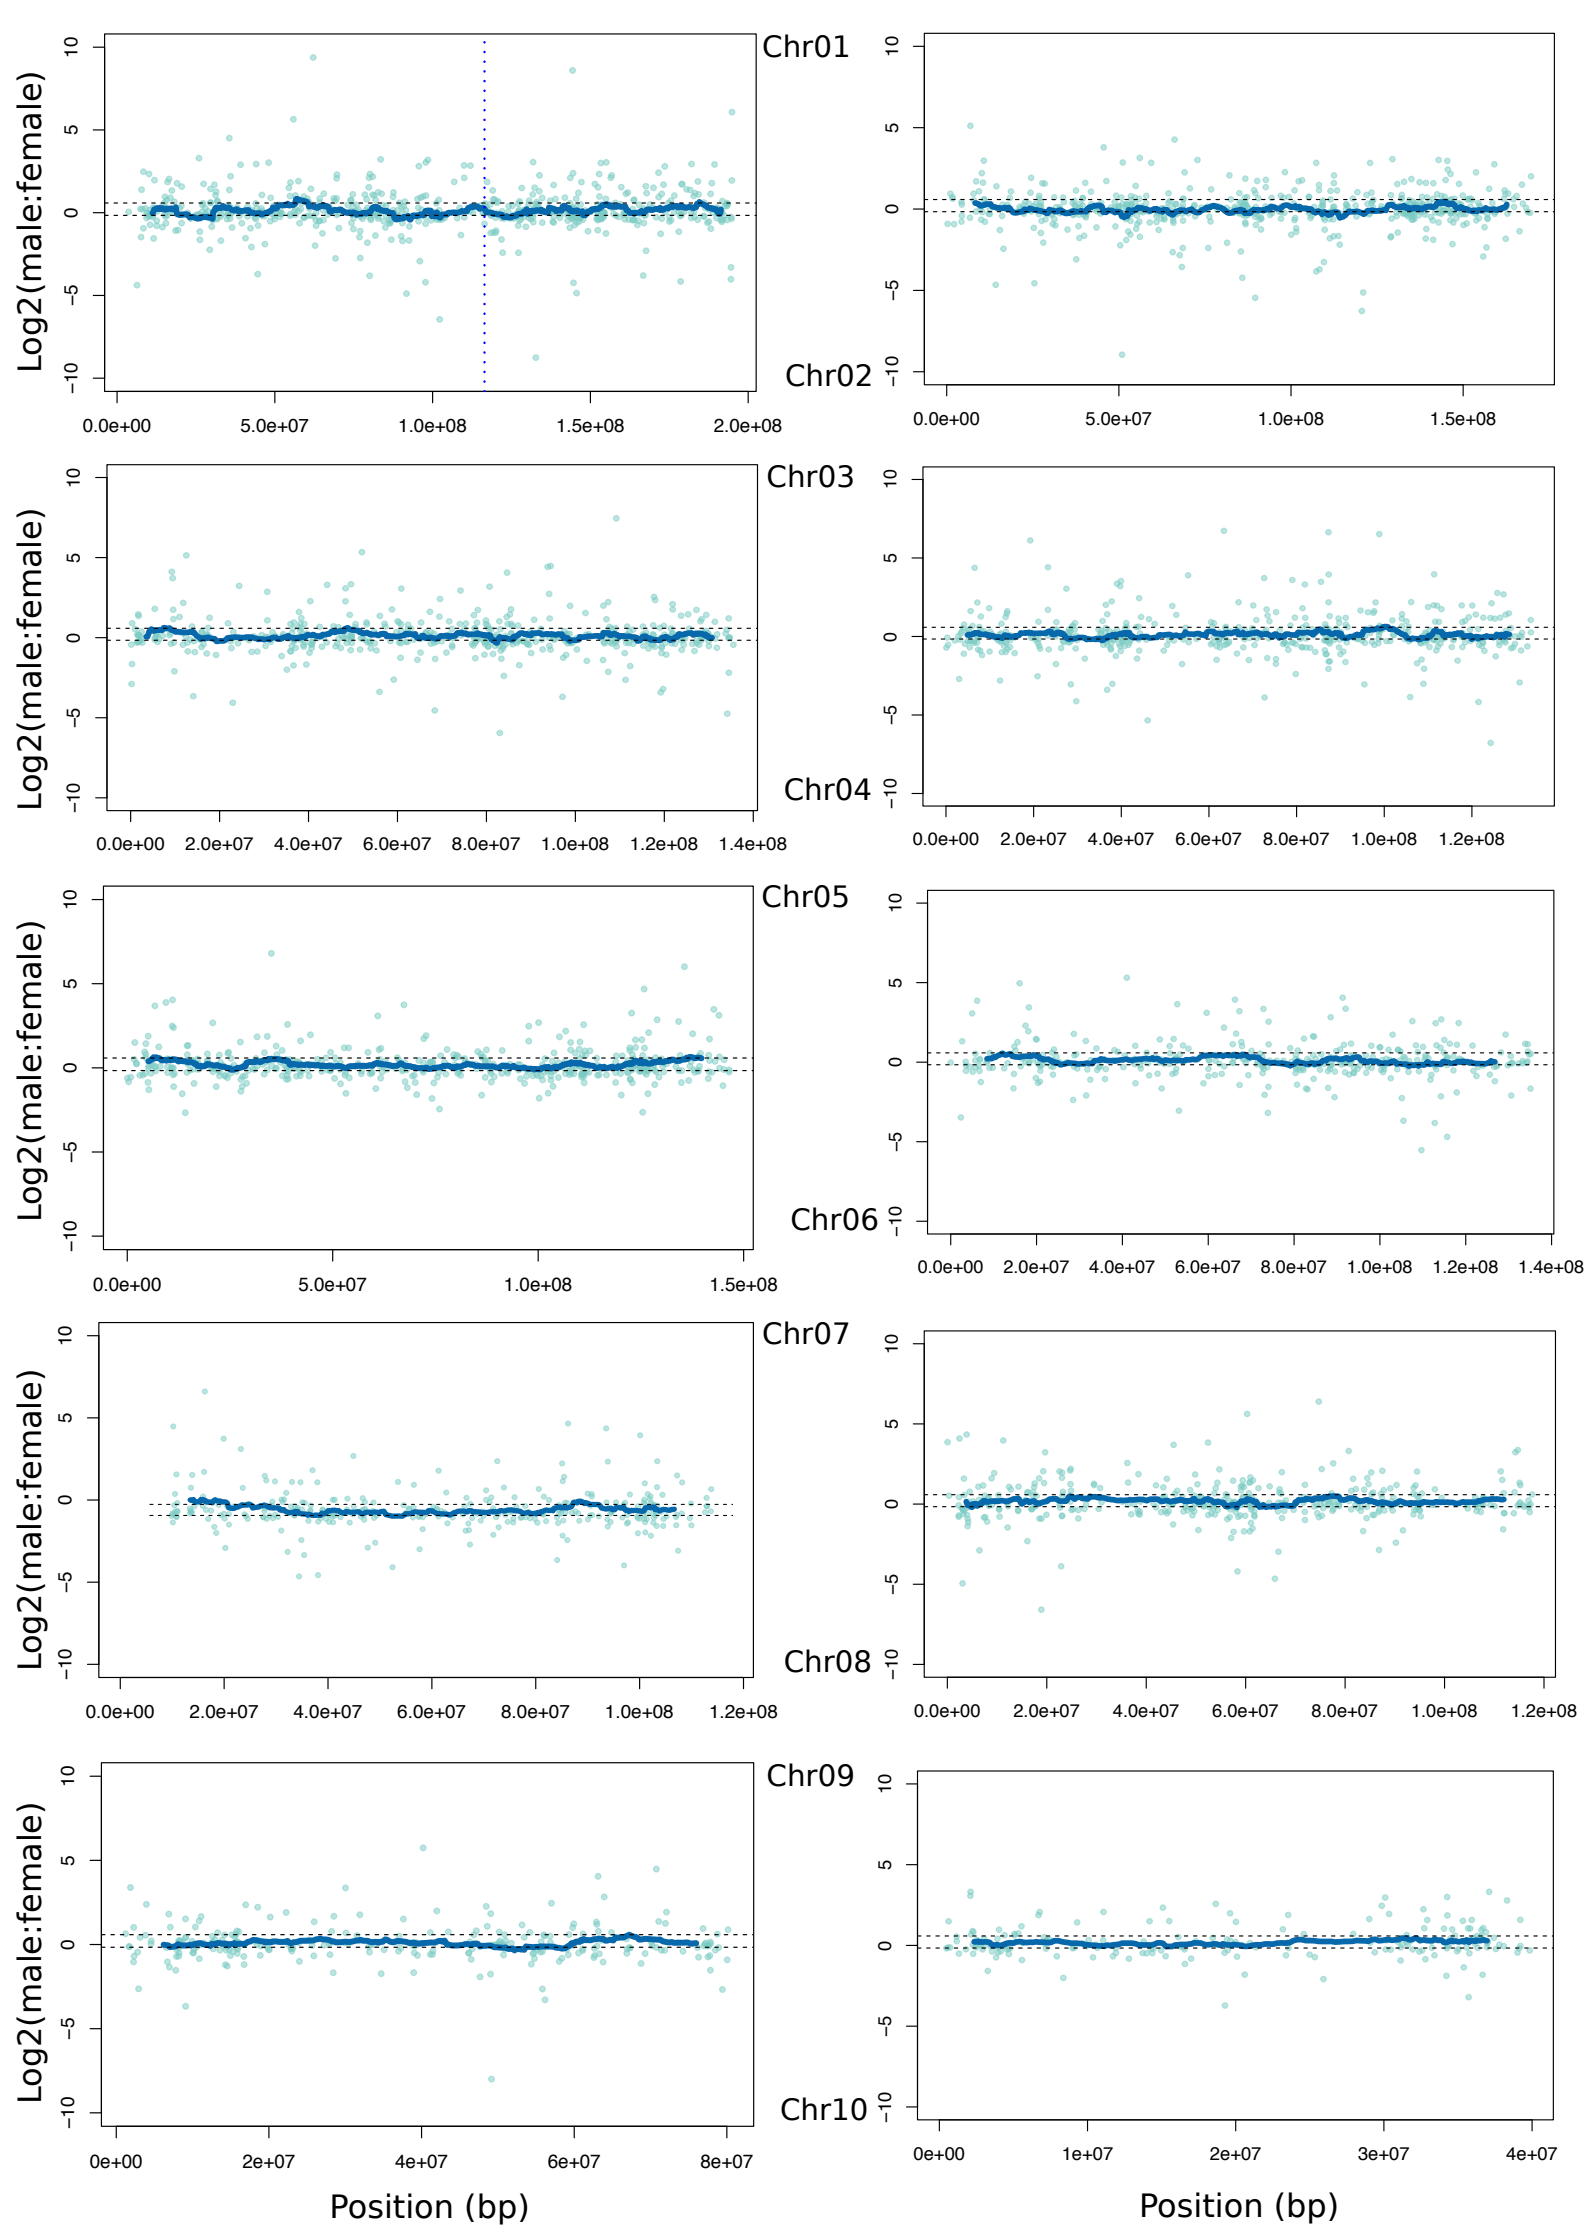

Supplement: s1 [file s1]
